# Supplementary material for: Fidelity in complex behaviour change interventions: a standardised approach to evaluate intervention integrity
Source: PubMed Central journal article supplement — BMJ Open. 2013 Nov 15;3(11):e003555. doi: 10.1136/bmjopen-2013-003555 (PMC3831105; doi:10.1136/bmjopen-2013-003555), 2013-11-15
Supplement: bmjopen-2013-003555.draft_revisions.pdf [file bmjopen-2013-003555.draft_revisions.pdf]

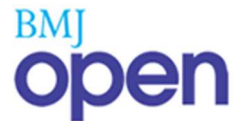

**Fidelity in complex behaviour change interventions: a standardised approach to evaluate intervention integrity.**

|                                 |                                                                                                                                                                                                                                                                                                                                                                                                                                                                                                                                                                                                                                                                                                     |
|---------------------------------|-----------------------------------------------------------------------------------------------------------------------------------------------------------------------------------------------------------------------------------------------------------------------------------------------------------------------------------------------------------------------------------------------------------------------------------------------------------------------------------------------------------------------------------------------------------------------------------------------------------------------------------------------------------------------------------------------------|
| Journal:                        | <i>BMJ Open</i>                                                                                                                                                                                                                                                                                                                                                                                                                                                                                                                                                                                                                                                                                     |
| Manuscript ID:                  | bmjopen-2013-003555                                                                                                                                                                                                                                                                                                                                                                                                                                                                                                                                                                                                                                                                                 |
| Article Type:                   | Research                                                                                                                                                                                                                                                                                                                                                                                                                                                                                                                                                                                                                                                                                            |
| Date Submitted by the Author:   | 12-Jul-2013                                                                                                                                                                                                                                                                                                                                                                                                                                                                                                                                                                                                                                                                                         |
| Complete List of Authors:       | Mars, Thomas; Blizzard Institute Barts and The London School of Medicine and Dentistry, Department of Primary Care and Public Health<br>Ellard, David; Warwick Medical School, Clinical trials Unit<br>Carnes, Dawn; Blizzard Institute, Barts and The London School of Medicine and Dentistry, Centre for Primary Care and Public Health<br>Homer, Kate; Blizzard Institute, Barts and The London School of Medicine and Dentistry, Centre for Primary Care and Public Health<br>Underwood, Martin; Warwick Medical School, Division of Health Sciences<br>Taylor, Stephanie; Blizzard Institute, Barts and The London School of Medicine and Dentistry, Centre for Primary Care and Public Health |
| <b>Primary Subject Heading</b>: | Research methods                                                                                                                                                                                                                                                                                                                                                                                                                                                                                                                                                                                                                                                                                    |
| Secondary Subject Heading:      | Patient-centred medicine                                                                                                                                                                                                                                                                                                                                                                                                                                                                                                                                                                                                                                                                            |
| Keywords:                       | Complex Interventions, Fidelity, Treatment Integrity                                                                                                                                                                                                                                                                                                                                                                                                                                                                                                                                                                                                                                                |
|                                 |                                                                                                                                                                                                                                                                                                                                                                                                                                                                                                                                                                                                                                                                                                     |

SCHOLARONE™  
Manuscripts

only

1  
2  
3 **Title: Fidelity in complex behaviour change interventions: a standardised approach to evaluate**  
4  
5 **intervention integrity.**  
6  
7

8  
9  
10 **Authors:**

11  
12 1)\* Mr. Tom Mars, Researcher, Centre for Primary Care and Public Health, Blizard Institute, Barts and  
13 The London School of Medicine and Dentistry, Yvonne Carter Building, 58 Turner Street, London. E1  
14 2AB. [t.s.mars@qmul.ac.uk](mailto:t.s.mars@qmul.ac.uk)  
15

16  
17 2) Dr. David Ellard, Senior Research Fellow, Clinical Trials Unit (T0.10), Warwick Medical school,  
18 University of Warwick, Coventry. CV4 7AL. [D.R.Ellard@warwick.ac.uk](mailto:D.R.Ellard@warwick.ac.uk).

19  
20 3) Dr. Dawn Carnes, Senior Researcher and COPERS Study Manager, Centre for Primary Care and  
21 Public Health, Blizard Institute, Barts and The London School of Medicine and Dentistry, Yvonne Carter  
22 Building, 58 Turner Street, London. E1 2AB. [d.carnes@qmul.ac.uk](mailto:d.carnes@qmul.ac.uk).  
23

24  
25 4) Ms. Kate Homer, Senior Researcher, Centre for Primary Care and Public Health, Blizard Institute,  
26 Barts and The London School of Medicine and Dentistry, Yvonne Carter Building, 58 Turner Street,  
27 London. E1 2AB. [k.homer@qmul.ac.uk](mailto:k.homer@qmul.ac.uk).

28  
29 5) Professor Martin Underwood, Professor of Primary Care Research, Head of Division, Division of  
30 Health Sciences, Warwick Medical School, University of Warwick, Coventry. CV4 7AL.  
31 [M.Underwood@warwick.ac.uk](mailto:M.Underwood@warwick.ac.uk).

32  
33 6) Professor Stephanie J.C. Taylor, Professor in Public Health and Primary Care, Centre for Primary  
34 Care and Public Health, Blizard Institute, Barts and The London School of Medicine and Dentistry,  
35 Yvonne Carter Building, 58 Turner Street, London. E1 2AB. [s.j.c.taylor@qmul.ac.uk](mailto:s.j.c.taylor@qmul.ac.uk).  
36

37  
38 \*corresponding author  
39

40  
41 **Keywords: Complex interventions, Fidelity, Treatment Integrity**  
42  
43

44  
45 Word count: 3325  
46  
47  
48  
49  
50  
51  
52  
53  
54  
55  
56  
57  
58  
59  
60

## Abstract

**Objectives:** The aim of this study was to a) demonstrate the development and testing of tools and procedures designed to monitor and assess the integrity of a complex intervention for chronic pain (COPERS self-management course); and b) make recommendations based on our experiences.

**Design:** Fidelity assessment of a two arm randomised controlled trial intervention, assessing adherence and competence of the facilitators delivering the intervention.

**Setting:** The intervention was delivered in the community in two centres in the UK: one inner city and one a mix of rural and urban locations.

**Participants:** 403 people with chronic musculoskeletal pain were enrolled in the intervention arm and 300 attended the self-management course. Thirty lay and healthcare professionals were trained and 24 delivered the courses (two per course). We ran 31 courses for up to 16 people per course all were audio recorded.

**Interventions:** The course was run over three and a half days; facilitators delivered a semi-structured manualised course.

**Outcomes:** We designed three measures to evaluate fidelity assessing adherence to the manual, competence and overall impression.

**Results:** We evaluated a random sample of four components from each course (n=122). The evaluation forms were reliable and had good face validity. There were high levels of adherence in the delivery, overall adherence was 2 (maximum 2 range, 1.67-2.00), facilitator competence exhibited more variability, overall competence was 1.5 (maximum 2, range, 1.25-2.00). Overall impression was 3 (maximum 4, range, 2.00-3.00).

**Conclusions:** Monitoring and assessing adherence and competence at the point of intervention delivery can be realised most efficiently by embedding the principles of fidelity measurement within the design stage of complex interventions and the training and assessment of those delivering the intervention. More work is necessary to ensure more robust systems of fidelity evaluation accompany the growth of complex interventions.

**Trial Registration:** ISRCTN No: ISRCTN24426731

**Keywords:** Complex interventions, Fidelity, Treatment Integrity

## Article summary

### Article focus

We outline the procedures for assessing the intervention integrity of a self-management intervention for chronic musculoskeletal pain.

### Key messages

The robust evaluation of intervention integrity is dependent on the *a priori* formulation of criteria based on the theoretical underpinnings, aims and content of the intervention.

Adherence and competence criteria should inform the training for those delivering the intervention and incorporated into programme manuals and supporting materials.

The evaluation of intervention integrity requires assessors who are trained and have a sophisticated understanding of the intervention.

### Strengths and limitations of this study

To our knowledge our work is the most systematic and rigorous evaluation of the intervention integrity of a complex behavior change intervention to date.

The lack of valid and reliable measures of adherence and competence make the assessment of their impact on outcomes difficult.

## Background

Tackling the challenges posed by chronic illness requires initiatives focussed on changing individual behaviour.[1] This has resulted in the proliferation of interventions of increasing complexity. Complex interventions have multiple interacting components and are recognised in Medical Research Council (MRC) guidance as having varied and challenging issues in their design, evaluation and implementation. [2] This guidance recognises that intervention fidelity is under-evaluated. Intervention fidelity is defined as the use of methodological strategies to monitor and enhance the reliability (i.e. the consistency) and validity (i.e. the appropriateness) of behavioural programmes.[3]

The construct of 'intervention fidelity' originated from concerns about the 'treatment integrity' of psychotherapeutic interventions expressed in the 1980s and 90s.[4-6] The monitoring, measurement and assessment of intervention fidelity is important as it has been demonstrated that fidelity is a mediator of study outcomes.[7-10] The analysis of intervention fidelity can provide explanations of research findings [5,11] for example where interventions lack impact, this may reflect implementation failure rather than genuine ineffectiveness.[2]

In the last twenty years, the notion of intervention fidelity has become increasingly differentiated and multi-layered.[12-14] There is an emerging science of intervention fidelity, relating to complex interventions presenting researchers with a number of conceptual, methodological and operational challenges.[15-19] There is an on-going debate about how core elements of fidelity are defined and measured [7,16,20] and a recognition of the need for reliable fidelity measurement instruments.[16,21]

There is little consensus about the key elements that contribute to intervention fidelity, possibly because it is a multidimensional construct.[12] Recent work has identified 5 domains of fidelity: study design, training, intervention delivery, intervention receipt by participants and intervention enactment, defined as the extent to which participants apply the skills learned.[13, 22]

In this paper we focus on the domain of intervention delivery or integrity, defined as the monitoring and assessment of behaviours at the point of intervention delivery. Intervention integrity is often considered to be

1 the heart of fidelity.[18] The effectiveness of complex interventions may be dependent on the 'skills' of those  
2  
3 delivering them.[19] 'Skills' can be characterised by separate but related constructs of adherence and  
4  
5 competence. Adherence is defined as: the extent to which a person delivers the essential content, delivery  
6  
7 strategies and theories prescribed by the intervention designers and avoids activities proscribed by them.  
8  
9 Competence refers to the level of 'skill' demonstrated by those delivering an intervention and may include the  
10  
11 ability to respond appropriately to a wide variety of contextual cues. Competence is less likely to be assessed  
12  
13 than adherence.[19] This may be a reflection of the on-going debate surrounding the definition of competence  
14  
15 and 'skill',[6] the methodological difficulties surrounding the monitoring and measurement of competence,[23]  
16  
17 and the significant expenditure of time and resource required collect and analyse competence data.[6]  
18  
19  
20  
21

22  
23 The association between levels of adherence and levels of competence is unclear,[11, 25] and the impact of  
24  
25 varying levels of adherence on outcomes is unresolved. Some studies have concluded that high levels of  
26  
27 adherence may reflect a lack of flexibility and compromise outcomes,[25] however others have concluded that  
28  
29 high levels of adherence are associated with improved outcomes.[24, 27] This suggests that the relationship  
30  
31 between outcomes and adherence is not linear, and that flexibility and deviation from predefined protocols may  
32  
33 result in lower levels of adherence but produce optimal results.  
34  
35  
36  
37

38 It has been argued that that the significant resource costs of maintaining a high level of vigilance in treatment  
39  
40 fidelity are more than outweighed by the scientific, economic and stakeholder consequences of disseminating  
41  
42 inadequately tested interventions or of implementing potentially effective programmes poorly.[3,13,28] Recent  
43  
44 evidence suggests that the assessment of intervention fidelity is not being conducted widely or  
45  
46 systematically.[1,13,18]  
47  
48  
49  
50

51 The aim of this study was to a) demonstrate the development and testing of tools and procedures designed to  
52  
53 monitor and assess the integrity of a complex intervention for chronic pain (COPERS self-management  
54  
55 course); and b) make recommendations based on our experiences.  
56  
57  
58  
59  
60

## 1 **Methods**

### 2 3 4 **The COPERS study**

5  
6  
7 The **CO**ping with persistent **P**ain, **E**ffectiveness **R**esearch into **S**elf-management (COPERS) is a complex  
8  
9 behaviour change intervention. It is a self-management course aimed at enabling participants living with long-  
10  
11 term musculoskeletal pain to improve the quality of their lives. COPERS is a three day course run for groups of  
12  
13 between 8 and 16 people. Specifically trained facilitators, one a healthcare professional and one a lay facilitator  
14  
15 with experience of living with long term pain conduct the groups. We tested the course's effectiveness in  
16  
17 randomised controlled trial (RCT) (ISRCTN 24426731). As part of the trial we developed, tested and  
18  
19 implemented a methodology to assess the intervention integrity of the COPERS course as it was delivered to  
20  
21 trial participants. In this paper we describe how we assessed fidelity, the challenges we encountered  
22  
23 measuring integrity, competence and adherence. We discuss these and provide recommendations based on  
24  
25 our experience to help inform others undertaking fidelity assessment of complex interventions.  
26  
27  
28  
29  
30  
31

### 32 **Data collection**

33  
34  
35 All the 32 COPERS courses were audio recorded with the consent of participants and these recordings were  
36  
37 used to assess and evaluate intervention integrity.  
38  
39  
40  
41  
42

### 43 **Developing the intervention integrity measures**

44  
45  
46 After piloting but prior to delivery of the COPERS trial we identified 7 of 24 course components considered to  
47  
48 be the most likely to effect participant behaviour change. These components focussed on participant education  
49  
50 and theoretically driven behaviour change techniques and strategies in contrast to other components that  
51  
52 encouraged social interaction, relaxation and postural awareness. Intervention integrity was assessed via our  
53  
54 audio-recordings of the components listed in Table 1.  
55  
56  
57  
58  
59  
60

Table 1. Components evaluated

| Component                                                                   | Theoretical bases                                                                          | Component Description                                                                                                                                                             |
|-----------------------------------------------------------------------------|--------------------------------------------------------------------------------------------|-----------------------------------------------------------------------------------------------------------------------------------------------------------------------------------|
| Component 2: (Day 1) Pain information                                       | Acceptance and commitment theory (ACT).[29-31]                                             | Participants watched a DVD aimed at educating them about chronic pain and introducing them, through facilitated discussion, to the notion of acceptance of their pain.            |
| Component 3: (Day 1) Acceptance                                             | Acceptance and commitment theory (ACT).[29-31]                                             | Participants were asked to consider a scenario about an uninvited/unwanted guest as a metaphor for their pain.                                                                    |
| Component 5: (Day 1) The pain cycle                                         | Fear avoidance model.[32]                                                                  | Groups were introduced to the pain cycle and the varied and individual emotions and behaviours that may perpetuate that cycle.                                                    |
| Component 9: (Day 2) Identifying problems, goal setting and action planning | Cognitive behavioural therapy (CBT) and theories of reasoned action/behaviour.[33,34]      | Groups were introduced to strategies to enable them to systematically identify problems, brainstorm creative solutions, set goals and devise strategies to escape the pain cycle. |
| Component 10: (Day 2) Barriers to change-unhelpful thinking                 | CBT and Rational Emotive Therapy.[33,35]                                                   | Groups were encouraged to consider that reflexive, automatic thinking patterns may prevent individuals from achieving their goals.                                                |
| Component 11: (Day 2) Barriers to change-reframing negatives to positives   | Acceptance and commitment theory (ACT) [29-31] CBT and change management principles). [33] | Participants were asked to consider what they were able to do rather than what they were unable to do.                                                                            |
| Component 12: (Day 2) Attention control and distraction                     | Attention control and distraction techniques.[36]                                          | Participants were introduced to techniques that might enable them to focus their minds away from thoughts about pain.                                                             |

A review of the existing literature indicated that few trials reported information on, or assessed intervention integrity. We used the monitoring and assessment tools from three trials to inform the development of our measures.[19,37,38] The learning outcomes outlined in the COPERS facilitator training course manual helped us to design a provisional set of criteria to measure:

i) "Adherence", a component specific measure was designed to assess the delivery of key elements as described in the COPERS facilitators' manual.



- 1 ii) “Competence”, a generic competence measure was designed to determine the extent to which the  
2  
3 facilitators created an environment in which participants could share their experiences and learn new skills.  
4  
5  
6 iii) “Overall impression”, this measure was designed to reflect the extent to which the aims and objectives of  
7  
8 the component were achieved and how the material was received by the group.  
9

10  
11 We tested a variety of scoring systems for adherence, competence and “overall impression” including:  
12  
13 dichotomous response categories, Likert and numeric scales, frequentist and occurrence/non-occurrence  
14  
15 methods. We tested inter-rater and intra-rater reliability and assessment efficiency. The research team revised  
16  
17 and amended the evaluation forms after piloting.  
18  
19

### 20 21 22 **Adherence measurement**

23  
24 The adherence evaluation form consisted of items that reflected the occurrence or non-occurrence of an event.  
25  
26 Component specific items, relating to the key elements prescribed in the COPERS facilitator’s manual, formed  
27  
28 the basis of the assessment, We assessed ‘Yes’, element occurred / was delivered (scored two points), ‘No’,  
29  
30 element did not occur / was not delivered (zero points) and ‘Unsure’ (one point).  
31  
32

33  
34 The number of adherence items varied between the different course components (Table 2). To ensure that all  
35  
36 scores from the components were standardised to a consistent scale we summed the ‘raw scores’ for each  
37  
38 component and divided them by the total number of items for that component. For example: component two  
39  
40 ‘Pain Information’ had six adherence items with a maximum ‘raw’ score of twelve (6x2), the total aggregate six  
41  
42 item score for this component was divided by six. Thus a maximum (100%) score was two and a minimum  
43  
44 score zero.  
45  
46  
47

### 48 49 **Competence measurement**

50  
51 The competence evaluation form was generic, it consisted of items related to: the extent to which the  
52  
53 facilitators introduced the aims/rationale of each component, the success or failure of the facilitators to  
54  
55 generate group discussion and individual disclosure, whether the facilitators’ consolidated and summarised  
56  
57 participant learning at the end of each component and/or linked learning to other components in the COPERS  
58  
59  
60

1 course. Assessment was given as 'Yes'/ demonstrated' (scored two points), 'No'/ not demonstrated (scored  
2 zero points), and 'Unsure' (scored one point). The scores were also standardised by dividing the maximum  
3 'raw' score of 8 by the number of items (i.e. four) thus represented by a maximum of two and a minimum score  
4 of zero.  
5  
6  
7  
8

### 10 **Overall impression rating**

11 We used a generic overall general impression scale ranging from one to four, anchored at one: 'did not go well'  
12 and four: 'excellent'.  
13  
14

### 18 **Selection of components to be evaluated**

19 We used a random sampling grid to select four of the seven selected components on each course. Evaluators  
20 listened to each recorded component in its entirety and rated adherence, competence and overall impression  
21 using a specially designed evaluation form that enabled evaluators to provide supportive quotes and/or  
22 comments to justify their ratings.  
23  
24  
25  
26  
27  
28

29 A number of components could not be analysed due to equipment failure, facilitators omitting to turn recording  
30 equipment on, incomplete recording or poor sound quality; evaluators were instructed to substitute that  
31 component with the next available selected component from that course.  
32  
33  
34  
35  
36

37 Members of the COPERS research team (DE, TM, KH) evaluated / assessed the audio recordings. To  
38 minimise bias team members evaluated courses they had not been involved in delivering.  
39  
40  
41  
42  
43  
44  
45

### 46 **Inter-rater/intra-rater reliability**

47 Ten percent of assessed component recordings were tested for inter and intra-rater reliability. A third party  
48 (DC) reviewed the evaluation forms and selected a purposive 10 per cent sample of evaluations that reflected  
49 a range of scores. These were used to assess reliability of the scoring methods. A period of at least two weeks  
50 between first and second evaluations was adopted for the intra-rater reliability testing. We assessed reliability  
51 using percentage agreement for each item rated on the evaluation forms.  
52  
53  
54  
55  
56  
57  
58  
59  
60

## Results

Thirty one COPERS courses were delivered. We assessed 122 COPERS components, totaling approximately 71 hours. Due to missing recordings 2 courses were assessed on three rather than four components. A summary of the number of components sampled and evaluated is shown in Table 2.

**Table 2. Number of items scored for each component evaluated**

| Component              | Number of components evaluated | Adherence: items evaluated | Competence: items evaluated | Overall Impression: items evaluated |
|------------------------|--------------------------------|----------------------------|-----------------------------|-------------------------------------|
| 2: Pain information    | 16                             | 6                          | 4                           | 1                                   |
| 3: Acceptance          | 17                             | 3                          | 4                           | 1                                   |
| 5: Pain cycle          | 20                             | 6                          | 4                           | 1                                   |
| 9: Goal setting        | 19                             | 8                          | 4                           | 1                                   |
| 10: Unhelpful thoughts | 18                             | 6                          | 4                           | 1                                   |
| 11: Reframing          | 28                             | 5                          | 4                           | 1                                   |
| 12: Attention control  | 14                             | 6                          | 4                           | 1                                   |

The overall adherence, competence and impression scores are shown in Table 3. As the scores were not normally distributed the median and 25<sup>th</sup> and 75<sup>th</sup> percentiles are presented.

## Data analysis

### Adherence

Overall COPERS courses achieved the maximum course delivery adherence score (Median 2.00), however there were some component score variations (Table 3). The lowest levels of adherence were observed for component 10: Unhelpful Thinking (Median 1.67, percentile 1.67-2.00), and component 2: Pain Information (Median 1.75, 1.42-2.00).

## Competence

Competence scores exhibited higher levels of variability than the adherence scores (Table 3). The overall course delivery competence score was a median of 1.5 (25%-75% percentile 1.25-2.00). The highest level of competence was for component 5: Pain cycle (median 1.88, 1.50-2.00) and the lowest for component 12: Attention Control (median 1.13, 1.00-1.63).

## Overall impression scores

The median overall impression score for all courses was 3 (maximum 4, 2.00-3.00). There was some component score variability (Table 3). Component 12: Attention Control had an overall impression score of 2.00, reflecting the low facilitator competence scores for this component. Component 11: Reframing had a similarly low overall impression score of 2 (2.00-3.25) although it was delivered with the maximum score for adherence (Median 2, 1.60-2.00) and good levels of competence (Median, 1.63, 1.25-2.00).

**Table 3. Overall adherence competence and impression scores**

| Component              | Overall adherence |                    | Overall competence |                    | Overall impression |                    |
|------------------------|-------------------|--------------------|--------------------|--------------------|--------------------|--------------------|
|                        | Median scores     | 25%-75% Percentile | Median scores      | 25%-75% Percentile | Median scores      | 25%-75% Percentile |
| 2: Pain information    | <b>1.75</b>       | 1.42-2.00          | <b>1.75</b>        | 1.25-2.00          | <b>3.00</b>        | 3.00-3.00          |
| 3: Acceptance          | <b>2.00</b>       | 1.83-2.00          | <b>1.50</b>        | 1.00-2.00          | <b>3.00</b>        | 2.50-3.00          |
| 5: Pain cycle          | <b>2.00</b>       | 2.00-2.00          | <b>1.88</b>        | 1.50-2.00          | <b>3.00</b>        | 3.00-4.00          |
| 9: Goal setting        | <b>2.00</b>       | 2.00-2.00          | <b>1.50</b>        | 1.00-2.00          | <b>3.00</b>        | 2.00-3.00          |
| 10: Unhelpful thinking | <b>1.67</b>       | 1.67-2.00          | <b>1.50</b>        | 1.00-1.81          | <b>3.00</b>        | 2.00-3.00          |
| 11: Reframing          | <b>2.00</b>       | 1.60-2.00          | <b>1.63</b>        | 1.25-2.00          | <b>2.00</b>        | 2.00-3.25          |
| 12: Attention control  | <b>2.00</b>       | 1.67-2.00          | <b>1.13</b>        | 1.00-1.63          | <b>2.00</b>        | 1.75-3.00          |
| Overall course score   | <b>2.00</b>       | 1.67-2.00          | <b>1.50</b>        | 1.25-2.00          | <b>3.00</b>        | 2.00-3.00          |

## Inter-rater/intra-rater reliability

Percentage agreement scores measured inter-rater reliability. Fifteen COPERS components were used to measure inter-rater reliability, they comprised 95 adherence item scores, 71 competence item scores and 15 overall impression scores. Inter-rater agreement was 80% for adherence items, 67% for competence items and 53.5% for overall impression scores.

Intra-rater reliability was measured using assessments from 16 COPERS components comprising 94 adherence item scores, 64 competence item scores and 16 overall impression scores intra-rater reliability 91% for adherence items, 75.7% for competence items and 69% for overall impression scores.

## Discussion

The aim of this study was to develop a methodology to assess the level of intervention integrity achieved during the delivery of the COPERS self-management course in a randomized controlled trial setting. To our knowledge this is the most systematic and rigorous published evaluation of the intervention integrity of a complex, theory based behavior change intervention to date. Overall the results suggest that the COPERS course was delivered competently and as intended. We describe the opportunities, challenges, achievements and limitations of this work and discuss these in the context of the emerging science of fidelity assessment with regard to intervention integrity and make recommendations based on our experience which may assist other trialists evaluating complex interventions.

Our work supports the suggestion that effective adherence in complex interventions may involve more than the delivery of prescribed 'surface' content but also adherence to essential but non-content related 'core' theoretical/structural elements.[14] For example, component10: 'Unhelpful Thinking' in the COPERS programme illustrates the challenges in defining adherence in complex interventions. This component was intended to help participants recognise and change patterns of automatic negative and self-limiting thoughts. The course manual outlined the informational content of this component, the structure, sequence, timing and

1 mode of delivery of the various elements to be used by the facilitators. To deliver this component as prescribed  
2  
3 a high level of adherence to both content and structure of the session was required. Component 10 had a  
4  
5 relatively low adherence score which was primarily caused by the facilitators' difficulty in maintaining the  
6  
7 complex structure of the tasks involved in this component rather than a failure to deliver the prescribed content.  
8  
9 High levels of adherence to protocols may be associated with a mechanistic, inflexible or unresponsive delivery  
10  
11 style and therefore associated with low levels of competence.[6] Conversely, sometimes facilitator 'failure' to  
12  
13 deliver the component content as prescribed i.e. low adherence was directly related to low levels of  
14  
15 competence. Parts of the course were designed to promote group participation, but if poorly sequenced or  
16  
17 timed they often resulted in a didactic/mechanistic delivery style that inhibited rather than encouraged group  
18  
19 disclosure and discussion.  
20  
21

22  
23  
24 Seemingly low levels of adherence however may not necessarily be associated with poor intervention delivery.  
25  
26 For example some facilitators deviated from instructions (and were by definition non-adherent) but these  
27  
28 deviations can be re-interpreted positively as the facilitators altered the delivery in response to individual or  
29  
30 group intervention receipt. Some of our facilitators subtly changed delivery from the prescribed content in the  
31  
32 manual but they still achieved the component's overall aims and objectives. This may be a demonstration of  
33  
34 high levels of facilitator competence despite being rated as non-adherent.[14] There is, as yet, little empirical  
35  
36 work that demonstrates the conditions that may influence adaptation or reinvention or whether, and in what  
37  
38 circumstances, these deviations from prescribed protocol may enhance outcomes or decrease  
39  
40 effectiveness.[16]  
41  
42  
43  
44  
45

46 The monitoring and assessment of competence within the COPERS study illustrated the difficulties associated  
47  
48 with its measurement. Recent work has identified competence as a complex construct that includes: the ability  
49  
50 to establish collaborative relationships and form alliances with participants,[39] through the use of responsive  
51  
52 tailoring of programme content,[39] the pacing of delivery,[40] and the use of positive verbal and non-verbal  
53  
54 behaviours.[42]  
55  
56  
57  
58  
59  
60

1 The findings from the COPERS study support those who consider that levels of competence are more  
2 sensitive to contextual factors than adherence.[6] The greater variability in our competence scores, compared  
3 to those for adherence reflect, in part, the diversity of facilitator skills required to deliver the COPERS  
4 programme and the recognised practical and methodological difficulties in measuring what may seem to be a  
5 subjective concept.[6,19,23]  
6  
7  
8  
9  
10

11 Our work supports the hypothesis that competence as a multidimensional construct. Effective intervention  
12 delivery may be influenced and moderated by many factors such as: positive or negative individuals and or  
13 groups, individual intervention receipt, component content, facilitator and co-facilitator coherence or  
14 incoherence, issues related to the use of computer hardware and software, the venue, the distribution of hand-  
15 outs, use of flip charts, the co-ordination and organisation of group activities, feedback and time management.  
16 Experience also influences competence and we noted that our facilitators appeared to improve with each  
17 course they conducted. Our ratings might also reflect the inexperience of the facilitators who were delivering a  
18 new initiative.  
19  
20  
21  
22  
23  
24  
25  
26  
27  
28  
29  
30

31 The overall impression measure was in part designed to reflect some of the 'non-facilitator determined' factors  
32 not evaluated by the adherence and competence measures. This subjective measure assessed the extent to  
33 which the component achieved its specific aims and was consistent with the goals of the wider programme.  
34 The overall impression measure proved to be challenging to use and the data difficult to interpret. Evaluators  
35 found it relatively straightforward to assess a component as either 'Excellent' or 'Did not go well', but the  
36 intermediate scores were less reliable.  
37  
38  
39  
40  
41  
42  
43  
44

### 45 **Limitations**

46 We used audio recordings to evaluate the components but it is doubtful if sound recordings alone can capture  
47 the subtleties of facilitator competence involving non-verbal behaviours, the dynamics of both facilitators and  
48 individual and group interactions. The adherence measures were designed to assess the fundamental  
49 requirements of course delivery, however the use of a generic competence measure may not have reflected  
50 the range of skills required to deliver the various course components. The absence of standardised definitions  
51  
52  
53  
54  
55  
56  
57  
58  
59  
60

1 and the lack of valid and reliable measures of adherence and competence made assessments of the impact on  
2  
3 outcomes difficult.[19]  
4

## 5 6 **Lessons learned** 7

8  
9 Our experience of assessing fidelity enabled us to gain valuable insights which may be of use to others  
10  
11 evaluating the fidelity of complex interventions, these are summarised in Table 4.  
12  
13

### 14 15 16 17 **Table 4. Insights / key messages on the application of a standardised approach to evaluate** 18 19 **intervention integrity.** 20 21

- |                                                                                                                                                                                                                                                                                                                                                                                                                                                                                                                                                                                                                                                                                                                                                                                                                                                                                                                                                                                                                                                                                                                                                                                                                                                                                                                                                                                                |
|------------------------------------------------------------------------------------------------------------------------------------------------------------------------------------------------------------------------------------------------------------------------------------------------------------------------------------------------------------------------------------------------------------------------------------------------------------------------------------------------------------------------------------------------------------------------------------------------------------------------------------------------------------------------------------------------------------------------------------------------------------------------------------------------------------------------------------------------------------------------------------------------------------------------------------------------------------------------------------------------------------------------------------------------------------------------------------------------------------------------------------------------------------------------------------------------------------------------------------------------------------------------------------------------------------------------------------------------------------------------------------------------|
| <p>22<br/>23<br/>24<br/>25 i) Evaluation of interventions is dependent on the <i>a priori</i> formulation of adherence and<br/>26 competence criteria based on the theoretical underpinnings, aims and content of the intervention.<br/>27<br/>28 ii) Adherence and competence criteria should be considered during the intervention design, inform<br/>29 the training for those delivering the intervention and should be incorporated into programme<br/>30 manuals and supporting materials.<br/>31<br/>32 iii) Evaluation of intervention integrity requires a sophisticated understanding of the intervention.<br/>33 Comprehensive fidelity assessor/evaluator training is essential.<br/>34<br/>35 iv) Evaluation of competence optimally requires data from multiple sources such as audio and<br/>36 video recordings, self-report and independent observation.<br/>37<br/>38 v) The comprehensive evaluation of competence requires the creation of measures that are<br/>39 sensitive to the complexity of the construct and take into account the intervention specific<br/>40 contextual variables that influence it.<br/>41<br/>42 vi) Levels of intervention integrity may vary over time. To ensure a valid assessment of<br/>43 intervention integrity it should be assessed systematically throughout the delivery phase of a trial.<br/>44<br/>45<br/>46<br/>47<br/>48</p> |
|------------------------------------------------------------------------------------------------------------------------------------------------------------------------------------------------------------------------------------------------------------------------------------------------------------------------------------------------------------------------------------------------------------------------------------------------------------------------------------------------------------------------------------------------------------------------------------------------------------------------------------------------------------------------------------------------------------------------------------------------------------------------------------------------------------------------------------------------------------------------------------------------------------------------------------------------------------------------------------------------------------------------------------------------------------------------------------------------------------------------------------------------------------------------------------------------------------------------------------------------------------------------------------------------------------------------------------------------------------------------------------------------|

## 49 50 **Conclusions** 51 52

53  
54  
55 We are confident that the COPERS intervention was delivered with high levels of adherence good levels of  
56 competence and that the programme aims were largely achieved and therefore we anticipate that our outcome  
57 data will not be influenced by poor intervention delivery. In this paper we presented a method for assessing  
58  
59  
60



1 adherence and competence and demonstrated its use in a large pragmatic RCT but we agree with the MRC  
2  
3 that more work is necessary to ensure that the growth of complex interventions is accompanied by more robust  
4  
5 systems of evaluation.  
6  
7  
8

### 9 **Author affiliations**

10  
11 <sup>1,3,4,6.</sup> Centre for Primary Care and Public Health, Blizard Institute, Barts and The London School of Medicine  
12  
13 and Dentistry, Yvonne Carter Building, 58 Turner Street, London. E1 2AB.  
14

15  
16 <sup>2.</sup> Clinical Trials Unit, Warwick Medical School, University of Warwick, Coventry. CV4 7AL.  
17

18  
19 <sup>6.</sup> Division of Health Sciences, Warwick Medical School, University of Warwick, Coventry. CV4 7AL.  
20  
21  
22

23 **Contributors** MU, DC and ST conceived the original idea for the COPERS study. DE wrote the fidelity protocol  
24  
25 with input from DC, KH, MU, TM and ST. DC, DE, KH and TM evaluated intervention integrity. TM wrote the  
26  
27 first draft of this paper, DC, DE, KH, MU, ST contributed to each successive draft of the manuscript.  
28  
29  
30  
31

32 **Funding** This paper presents independent research commissioned by the National Institute for Health  
33  
34 Research (NIHR) under its Programme Grants for Applied Research scheme (RP-PG-0707-10189). The views  
35  
36 expressed in this publication are those of the authors and not necessarily those of the NHS, the NIHR or the  
37  
38 Department of Health. This project benefitted from facilities funded through the Birmingham Science City  
39  
40 Translational Medicine Clinical Research and Infrastructure Trials platform, with support from Advantage West  
41  
42 Midlands.  
43  
44  
45  
46

47 **Competing interests** None  
48  
49  
50  
51

52 **Ethics approval** Ethics approval was given by Cambridge Ethics Committee 11/EE/046.  
53

54 Trial registration: ISRCTN24426731  
55  
56  
57  
58

59 **Provenance and peer review** Not commissioned; internally peer reviewed.  
60

1 **References**

- 2  
3  
4 1. Michie S, Fixsen D, Grimshaw JM, et al. Specifying and reporting complex behaviour change  
5 interventions: the need for a scientific method. *Implementation Science* 2009,4:40.  
6  
7  
8  
9  
10 2. Medical Research Council: Developing and Evaluating Complex Interventions: New Guidance. London.  
11 2008.  
12  
13  
14  
15  
16  
17 3. Bellg AJ, Borrelli B, Resnick B, et al. Enhancing treatment fidelity in health behavior change studies:  
18 best practices and recommendations from the NIH Behavior Change Consortium. *Health Psychology*  
19 2004,23(5):443-451.  
20  
21  
22  
23  
24  
25  
26 4. Yeaton WH, Sechrest L. Critical dimensions in the choice and maintenance of successful treatments:  
27 strength, integrity, and effectiveness. *Journal of consulting and clinical psychology* 1981,49(2):156-167.  
28  
29  
30  
31  
32 5. Moncher FJ, Prinz R. Treatment Fidelity in Outcome Studies. *Clinical Psychology Review* 1991,  
33 11:247-266.  
34  
35  
36  
37  
38  
39 6. Waltz J, Addis ME, Koerner K, Jacobson NS. Testing the integrity of a psychotherapy protocol:  
40 assessment of adherence and competence. *Journal of consulting and clinical psychology*  
41 1993,61(4):620-630.  
42  
43  
44  
45  
46  
47 7. Mihalic SF. The Importance of Implementation Fidelity. Violence Prevention Initiative. Boulder,  
48 Colorado; 2002.  
49  
50  
51  
52  
53  
54 8. Elliot D, Mihalic S. Issues in disseminating and replicating effective prevention programs. *Prevention*  
55 *Science* 2004,5:47-53.  
56  
57  
58  
59  
60

- 1 9. Noel P. The impact of therapeutic case management on participation in adolescent substance abuse  
2 treatment. *American Journal of Alcohol Abuse* 2006,13:311-327.  
3  
4  
5  
6  
7  
8 10. Thomas RE, Baker P, Lorenzetti D. Family-based programmes for preventing smoking by children and  
9 adolescents. *Cochrane Systematic Review* CD004493. 2007.  
10  
11  
12  
13  
14 11. Perepletchikova F, Kazdin A. Treatment Integrity and Therapeutic Change:  
15 Issues and Research Recommendations. *Clinical Psychological Practice* 2005,12:365-383.  
16  
17  
18  
19  
20 12. Steckler A, Linnan L, eds. *Process Evaluation for Public Health interventions and Research*. San  
21 Francisco: Wiley (Jossey-Bass); 2002.  
22  
23  
24  
25  
26  
27 13. Borrelli B, Sepinwall D, Ernst D, et al. A new tool to assess treatment fidelity and evaluation of  
28 treatment fidelity across 10 years of health behavior research. *Journal of consulting and clinical*  
29 *psychology* 2005,73(5):852-860.  
30  
31  
32  
33  
34  
35  
36 14. Durlak JA, Du Pre EP. Implementation matters: a review of research on the influence of implementation  
37 on program outcomes and the factors affecting implementation. *Am J Community Psychology*  
38 2008,41(3-4):327-350.  
39  
40  
41  
42  
43  
44 15. Hulscher ME, Laurant MG, Grol RP. Process evaluation on quality improvement interventions. *Quality*  
45 *Safety and Health Care* 2003,12(1):40-46.  
46  
47  
48  
49  
50  
51 16. Dusenbury L, Brannigan R, Falco M, et al. A review of research on fidelity of implementation:  
52 implications for drug abuse prevention in school settings. *Health Education Res* 2003,18(2):237-256.  
53  
54  
55  
56  
57 17. Carroll C, Patterson M, Wood S, et al. A conceptual framework for implementation fidelity. *Implement*  
58 *Science* 2007,2:40.  
59  
60

- 1  
2  
3 18. Gearing RE, El-Bassel N, Ghesquiere A, et al. Major ingredients of fidelity: a review and scientific guide  
4 to improving quality of intervention research implementation. *Clinical Psychology Rev* 2011,31(1):79-88.  
5  
6  
7  
8  
9  
10 19. Cross WF, West JC. Examining implementer fidelity: Conceptualizing and measuring adherence and  
11 competence. *J Child Serv* 2011,6(1):18-33.  
12  
13  
14  
15  
16 20. Mihalic SF, Argamaso S. Implementing the Life Skills training drug prevention program: factors related  
17 to implementation fidelity. *Implementation Science* 2008,3(5).  
18  
19  
20  
21  
22  
23 21. Parham LD, Cohn ES, E, Spitzer S, et al. Development of a fidelity measure for research on the  
24 effectiveness of the Ayres Sensory Integration intervention. *Am J Occup Ther* 2011, 65(2):133-142.  
25  
26  
27  
28  
29 22. Borrelli B. The Assessment, Monitoring, and Enhancement of Treatment Fidelity In Public Health  
30 Clinical Trials. *J Public Health Dent* 2011,71(s1):S52-S63.  
31  
32  
33  
34  
35  
36 23. Stiles WB, Honos-Webb L, Surko M. Responsiveness in psychotherapy. *Clinical Psychology: Science*  
37 *and Practice* 1998, 5(4):438-458.  
38  
39  
40  
41  
42 24. Barber JP, Mercer D, Krakauer I, et al. Development of an adherence/competence rating scale for  
43 individual drug counselling. *Drug Alcohol Depend* 1996,43(3):125-132.  
44  
45  
46  
47  
48  
49 25. Castonguay LG, Goldfried M, Wiser SRP, et al. Predicting the effect of cognitive therapy for depression:  
50 a study of unique and common factors. *Journal of consulting and clinical psychology* 1996,64(3):497-  
51 504.  
52  
53  
54  
55  
56  
57 26. Huey SJ Jr, Henggeler SW, Melton GB, et al. Mechanisms of change in multisystemic therapy: reducing  
58 delinquent behavior through therapist adherence and improved family and peer functioning. *Journal of*  
59  
60

- 1 consulting and clinical psychology 2000,68(3):451-467.
- 2
- 3
- 4
- 5 27. Barber JP, Crits-Christoph P, Luborsky L. Effects of therapist adherence and competence on patient
- 6 outcome in brief dynamic therapy. *Journal of consulting and clinical psychology* 1996, 64(3):619-622.
- 7
- 8
- 9
- 10
- 11 28. Henggeler SW, Rowland MD, Pickrel SG, et al. Investigating family-based alternatives to institution-
- 12 based mental health services for youth: lessons learned from the pilot study of a randomized field trial.
- 13 *J Clin Child Psychol* 1997,26(3):226-233.
- 14
- 15
- 16
- 17
- 18
- 19
- 20 29. Hayes SC, Strosahl KD, Wilson KG. Acceptance and Commitment Therapy: An Experiential Approach
- 21 to Behaviour Change: Guilford Press; 2004.
- 22
- 23
- 24
- 25
- 26
- 27 30. Hayes SC, Smith SX. Get Out of Your Mind and into Your Life: The New Acceptance and Commitment
- 28 Therapy. New Harbinger Publications; 2005.
- 29
- 30
- 31
- 32
- 33 31. McCracken LM, Vowles KE, Eccleston C: Acceptance of chronic pain: component analysis and a
- 34 revised assessment method. *Pain* 2004,107(1-2):159-166.
- 35
- 36
- 37
- 38
- 39
- 40 32. Vlaeyen JW, Linton SJ. Fear-avoidance and its consequences in chronic musculoskeletal pain: a state
- 41 of the art. *Pain* 2000,85(3):317-332.
- 42
- 43
- 44
- 45
- 46 33. Beck JS. Cognitive Therapy. New York: The Guildford Press; 1995.
- 47
- 48
- 49
- 50
- 51 34. Bandura A. Social Foundations of Thought and Action: A Social Cognitive Theory. Pearson
- 52 Education;1986.
- 53
- 54
- 55
- 56
- 57 35. Ellis A, Dryden W. The Practice of Rational Emotive Behavior therapy. 2nd ed: Springer Publishing;
- 58 2007.
- 59
- 60

- 1  
2  
3 36. Morley S, Shapiro DA, Biggs J. Developing a treatment manual for attention management in chronic  
4 pain. *Cognitive Behaviour Therapy* 2004,33(1):1-11.  
5  
6  
7  
8  
9  
10 37. Carroll KM, Nich C, Rounasville BJ. Use of observer and therapist ratings to monitor delivery of coping  
11 skills treatment for cocaine abusers: utility of therapist session checklists. *Psychotherapy Research*  
12 1998,8:307-320.  
13  
14  
15  
16  
17  
18 38. Carroll KM, Nich C, Sifry RL, et al. A general system for evaluating therapist adherence and  
19 competence in psychotherapy research in the addictions. *Drug and Alcohol Dependence*  
20 2000,57(3):225-238.  
21  
22  
23  
24  
25  
26  
27 39. Creed TA, Kendall PC. Therapist alliance-building behavior within a cognitive-behavioral treatment for  
28 anxiety in youth. *Journal of consulting and clinical psychology* 2005,73(3):498-505.  
29  
30  
31  
32  
33  
34 40. Davidson K, Scott J, Schmidt U, et al. Therapist competence and clinical outcome in the Prevention of  
35 Parasuicide by Manual Assisted Cognitive Behaviour Therapy trial: the POPMACT study. *Psychol Med*  
36 2004,34(5):855-863.  
37  
38  
39  
40  
41  
42 41. Lochman JE, Boxmeyer C, Powell N, et al. Dissemination of the Coping Power program: importance of  
43 intensity of counselor training. *Journal of consulting and clinical psychology* 2009,77(3):397-409.  
44  
45  
46  
47  
48  
49 42. Crowe TP, Grenyer BFS. Is therapist alliance or whole group cohesion more influential in group  
50 psychology outcomes? *Clinical Psychology and Psychotherapeutics* 2008,15:239-246.  
51  
52  
53  
54  
55  
56  
57  
58  
59  
60



**Fidelity in complex behaviour change interventions: a standardised approach to evaluate intervention integrity.**

|                                 |                                                                                                                                                                                                                                                                                                                                                                                                                                                                                                                                                                                                                                                                                                 |
|---------------------------------|-------------------------------------------------------------------------------------------------------------------------------------------------------------------------------------------------------------------------------------------------------------------------------------------------------------------------------------------------------------------------------------------------------------------------------------------------------------------------------------------------------------------------------------------------------------------------------------------------------------------------------------------------------------------------------------------------|
| Journal:                        | <i>BMJ Open</i>                                                                                                                                                                                                                                                                                                                                                                                                                                                                                                                                                                                                                                                                                 |
| Manuscript ID:                  | bmjopen-2013-003555.R1                                                                                                                                                                                                                                                                                                                                                                                                                                                                                                                                                                                                                                                                          |
| Article Type:                   | Research                                                                                                                                                                                                                                                                                                                                                                                                                                                                                                                                                                                                                                                                                        |
| Date Submitted by the Author:   | 03-Oct-2013                                                                                                                                                                                                                                                                                                                                                                                                                                                                                                                                                                                                                                                                                     |
| Complete List of Authors:       | Mars, Thomas; Blizard Institute Barts and The London School of Medicine and Dentistry, Department of Primary Care and Public Health<br>Ellard, David; Warwick Medical School, Clinical trials Unit<br>Carnes, Dawn; Blizard Institute, Barts and The London School of Medicine and Dentistry, Centre for Primary Care and Public Health<br>Homer, Kate; Blizard Institute, Barts and The London School of Medicine and Dentistry, Centre for Primary Care and Public Health<br>Underwood, Martin; Warwick Medical School, Division of Health Sciences<br>Taylor, Stephanie; Blizard Institute, Barts and The London School of Medicine and Dentistry, Centre for Primary Care and Public Health |
| <b>Primary Subject Heading</b>: | Research methods                                                                                                                                                                                                                                                                                                                                                                                                                                                                                                                                                                                                                                                                                |
| Secondary Subject Heading:      | Patient-centred medicine                                                                                                                                                                                                                                                                                                                                                                                                                                                                                                                                                                                                                                                                        |
| Keywords:                       | Complex Interventions, Fidelity, Treatment Integrity                                                                                                                                                                                                                                                                                                                                                                                                                                                                                                                                                                                                                                            |
|                                 |                                                                                                                                                                                                                                                                                                                                                                                                                                                                                                                                                                                                                                                                                                 |

SCHOLARONE™  
Manuscripts

only

1  
2  
3 **Title: Fidelity in complex behaviour change interventions: a standardised approach to evaluate**  
4  
5 **intervention integrity.**  
6  
7

8  
9  
10 **Authors:**

11  
12 1)\* Mr. Tom Mars, Researcher, Centre for Primary Care and Public Health, Blizard Institute, Barts and  
13 The London School of Medicine and Dentistry, Yvonne Carter Building, 58 Turner Street, London. E1  
14 2AB. [t.s.mars@qmul.ac.uk](mailto:t.s.mars@qmul.ac.uk)  
15

16  
17 2) Dr. David Ellard, Senior Research Fellow, Clinical Trials Unit (T0.10), Warwick Medical school,  
18 University of Warwick, Coventry. CV4 7AL. [D.R.Ellard@warwick.ac.uk](mailto:D.R.Ellard@warwick.ac.uk).

19  
20 3) Dr. Dawn Carnes, Senior Researcher and COPERS Study Manager, Centre for Primary Care and  
21 Public Health, Blizard Institute, Barts and The London School of Medicine and Dentistry, Yvonne Carter  
22 Building, 58 Turner Street, London. E1 2AB. [d.carnes@qmul.ac.uk](mailto:d.carnes@qmul.ac.uk).  
23

24  
25 4) Ms. Kate Homer, Senior Researcher, Centre for Primary Care and Public Health, Blizard Institute,  
26 Barts and The London School of Medicine and Dentistry, Yvonne Carter Building, 58 Turner Street,  
27 London. E1 2AB. [k.homer@qmul.ac.uk](mailto:k.homer@qmul.ac.uk).

28  
29 5) Professor Martin Underwood, Professor of Primary Care Research, Head of Division, Division of  
30 Health Sciences, Warwick Medical School, University of Warwick, Coventry. CV4 7AL.  
31 [M.Underwood@warwick.ac.uk](mailto:M.Underwood@warwick.ac.uk).

32  
33 6) Professor Stephanie J.C. Taylor, Professor in Public Health and Primary Care, Centre for Primary  
34 Care and Public Health, Blizard Institute, Barts and The London School of Medicine and Dentistry,  
35 Yvonne Carter Building, 58 Turner Street, London. E1 2AB. [s.j.c.taylor@qmul.ac.uk](mailto:s.j.c.taylor@qmul.ac.uk).  
36

37  
38 \*corresponding author  
39

40  
41 **Keywords: Complex interventions, Fidelity, Treatment Integrity**  
42  
43

44  
45 Word count: 3777  
46  
47  
48  
49  
50  
51  
52  
53  
54  
55  
56  
57  
58  
59  
60



## Abstract

**Objectives:** The aim of this study was to a) demonstrate the development and testing of tools and procedures designed to monitor and assess the integrity of a complex intervention for chronic pain (COPERS self-management course); and b) make recommendations based on our experiences.

**Design:** Fidelity assessment of a two arm randomised controlled trial intervention, assessing adherence and competence of the facilitators delivering the intervention.

**Setting:** The intervention was delivered in the community in two centres in the UK: one inner city and one a mix of rural and urban locations.

**Participants:** 403 people with chronic musculoskeletal pain were enrolled in the intervention arm and 300 attended the self-management course. Thirty lay and healthcare professionals were trained and 24 delivered the courses (two per course). We ran 31 courses for up to 16 people per course all were audio recorded.

**Interventions:** The course was run over three and a half days; facilitators delivered a semi-structured manualised course.

**Outcomes:** We designed three measures to evaluate fidelity assessing adherence to the manual, competence and overall impression.

**Results:** We evaluated a random sample of four components from each course (n=122). The evaluation forms were reliable and had good face validity. There were high levels of adherence in the delivery, overall adherence was two (maximum 2, IQR 1.67-2.00), facilitator competence exhibited more variability, overall competence was 1.5 (maximum 2, IQR 1.25-2.00). Overall impression was three (maximum 4, IQR 2.00-3.00).

**Conclusions:** Monitoring and assessing adherence and competence at the point of intervention delivery can be realised most efficiently by embedding the principles of fidelity measurement within the design stage of complex interventions and the training and assessment of those delivering the intervention. More work is necessary to ensure more robust systems of fidelity evaluation accompany the growth of complex interventions.

**Trial Registration:** ISRCTN No: ISRCTN24426731

**Keywords:** Complex interventions, Fidelity, Treatment Integrity

## Article summary

### Article focus

We outline the procedures for assessing the intervention integrity of a self-management intervention for chronic musculoskeletal pain.

### Key messages

The robust evaluation of intervention integrity is dependent on the *a priori* formulation of criteria based on the theoretical underpinnings, aims and content of the intervention.

Adherence and competence criteria should inform the training for those delivering the intervention and incorporated into programme manuals and supporting materials.

The evaluation of intervention integrity requires assessors who are trained and have a sophisticated understanding of the intervention.

### Strengths and limitations of this study

To our knowledge our work is the most systematic and rigorous evaluation of the intervention integrity of a complex behavior change intervention to date.

The lack of valid and reliable measures of adherence and competence make the assessment of their impact on outcomes difficult.

## Background

Tackling the challenges posed by chronic illness requires initiatives focussed on changing individual behaviour.[1] This has resulted in the proliferation of interventions of increasing complexity. Complex interventions have multiple interacting components and are recognised in Medical Research Council (MRC) guidance as having varied and challenging issues in their design, evaluation and implementation. [2] This guidance recognises that intervention fidelity is under-evaluated. Intervention fidelity is defined as the use of methodological strategies to monitor and enhance the reliability (i.e. the consistency) and validity (i.e. the appropriateness) of behavioural programmes.[3]

The construct of 'intervention fidelity' originated from concerns about the 'treatment integrity' of psychotherapeutic interventions expressed in the 1980s and 90s.[4,5,7] The monitoring, measurement and assessment of intervention fidelity is important as it has been demonstrated that fidelity is a mediator of study outcomes.[8-11] The analysis of intervention fidelity can provide explanations of research findings [5,12] for example where interventions lack impact, this may reflect implementation failure rather than genuine ineffectiveness.[2] The assessment of intervention fidelity is significant in the maintenance of both internal and external validity. Internal validity may be compromised by 'Type III errors' [6] that arise from the evaluation of a program that has been inadequately implemented. External validity may be improved by rigorous fidelity assessment that facilitates treatment replication across studies and assists the evaluation and development of treatments in applied settings.

In the last twenty years, the notion of intervention fidelity has become increasingly differentiated and multi-layered.[13-15] There is an emerging science of intervention fidelity, relating to complex interventions presenting researchers with a number of conceptual, methodological and operational challenges.[16-20] There is an on-going debate about how core elements of fidelity are defined and measured [8,17,21] and a recognition of the need for reliable fidelity measurement instruments.[17,22]

1 There is little consensus about the key elements that contribute to intervention fidelity, possibly because it is a  
2 multidimensional construct.[13] Recent work has identified five domains of fidelity: study design, training,  
3 intervention delivery, intervention receipt by participants and intervention enactment, defined as the extent to  
4 which participants apply the skills learned.[14, 23]  
5  
6  
7  
8  
9

10 In this paper we focus on the domain of intervention delivery or integrity, defined as the monitoring and  
11 assessment of behaviours at the point of intervention delivery. Intervention integrity is often considered to be  
12 the heart of fidelity.[19] The effectiveness of complex interventions may be dependent on the 'skills' of those  
13 delivering them.[20] 'Skills' can be characterised by separate but related constructs of adherence and  
14 competence. Adherence is defined as: the extent to which a person delivers the essential content, delivery  
15 strategies and theories prescribed by the intervention designers and avoids activities proscribed by them.  
16  
17 Competence refers to the level of 'skill' demonstrated by those delivering an intervention and may include the  
18 ability to respond appropriately to a wide variety of contextual cues. Competence is less likely to be assessed  
19 than adherence.[19] This may be a reflection of the on-going debate surrounding the definition of competence  
20 and 'skill',[7] the methodological difficulties surrounding the monitoring and measurement of competence,[24]  
21 and the significant expenditure of time and resource required collect and analyse competence data.[7]  
22  
23  
24  
25  
26  
27  
28  
29  
30  
31  
32  
33  
34  
35  
36

37 The association between levels of adherence and levels of competence is unclear,[12, 26] and the impact of  
38 varying levels of adherence on outcomes is unresolved. Some studies have concluded that high levels of  
39 adherence may reflect a lack of flexibility and compromise outcomes,[26] however others have concluded that  
40 high levels of adherence are associated with improved outcomes.[25, 28] This suggests that the relationship  
41 between outcomes and adherence is not linear, and that flexibility and deviation from predefined protocols may  
42 result in lower levels of adherence but produce optimal results.  
43  
44  
45  
46  
47  
48  
49  
50  
51

52 It has been argued that that the significant resource costs of maintaining a high level of vigilance in treatment  
53 fidelity are more than outweighed by the scientific, economic and stakeholder consequences of disseminating  
54 inadequately tested interventions or of implementing potentially effective programmes poorly.[3,14,29] Recent  
55  
56  
57  
58  
59  
60

1 evidence suggests that the assessment of intervention fidelity is not being conducted widely or  
2  
3 systematically.[1,14,19]  
4  
5  
6

7 The aim of this study was to a) demonstrate the development and testing of tools and procedures designed to  
8 monitor and assess the intervention integrity of a complex intervention for chronic pain (COPERS self-  
9 management course); and b) make recommendations based on our experiences.  
10  
11  
12  
13

## 14 15 16 17 **Methods**

### 18 19 20 **The COPERS study**

21  
22  
23 The **CO**ping with persistent **Pain**, **E**ffectiveness **R**esearch into **S**elf-management (COPERS) is a complex  
24 behaviour change intervention. It is a self-management course aimed at enabling participants living with long-  
25 term musculoskeletal pain to improve the quality of their lives. COPERS is a three day course run for groups of  
26 between eight and sixteen people. Specifically trained facilitators, one a healthcare professional and one a lay  
27 facilitator with experience of living with long term pain conduct the groups. We tested the course's  
28 effectiveness in randomised controlled trial (RCT) (ISRCTN 24426731). As part of the trial we developed,  
29 tested and implemented a methodology to assess the intervention integrity of the COPERS course as it was  
30 delivered to trial participants. In this paper we describe how we assessed fidelity, the challenges we  
31 encountered measuring integrity, competence and adherence. We discuss these and provide  
32 recommendations based on our experience to help inform others undertaking fidelity assessment of complex  
33 interventions.  
34  
35  
36  
37  
38  
39  
40  
41  
42  
43  
44  
45  
46  
47  
48  
49

### 50 **Data collection**

51  
52  
53 All the 32 COPERS courses were audio recorded with the consent of participants and these recordings were  
54 used to assess and evaluate intervention integrity.  
55  
56  
57  
58  
59  
60

## Developing the intervention integrity measures

After piloting, but prior to delivery of the trial, we identified seven of 24 course components that were based on key cognitive behavioural elements relating to the theoretical foundations of the COPERS intervention, and which we considered to be the most likely to effect participant behaviour change. These components focussed on participant education and theoretically driven behaviour change techniques and strategies in contrast to other components that encouraged social interaction, relaxation and postural awareness. Intervention integrity was assessed via our audio-recordings of the components listed in Table 1.

**Table 1. Components evaluated**

| Component                                                                   | Theoretical bases                                                                          | Component Description                                                                                                                                                             |
|-----------------------------------------------------------------------------|--------------------------------------------------------------------------------------------|-----------------------------------------------------------------------------------------------------------------------------------------------------------------------------------|
| Component 2: (Day 1) Pain information                                       | Acceptance and commitment theory (ACT).[30-32]                                             | Participants watched a DVD aimed at educating them about chronic pain and introducing them, through facilitated discussion, to the notion of acceptance of their pain.            |
| Component 3: (Day 1) Acceptance                                             | Acceptance and commitment theory (ACT).[30-32]                                             | Participants were asked to consider a scenario about an uninvited/unwanted guest as a metaphor for their pain.                                                                    |
| Component 5: (Day 1) The pain cycle                                         | Fear avoidance model.[33]                                                                  | Groups were introduced to the pain cycle and the varied and individual emotions and behaviours that may perpetuate that cycle.                                                    |
| Component 9: (Day 2) Identifying problems, goal setting and action planning | Cognitive behavioural therapy (CBT) and theories of reasoned action/behaviour.[34,35]      | Groups were introduced to strategies to enable them to systematically identify problems, brainstorm creative solutions, set goals and devise strategies to escape the pain cycle. |
| Component 10: (Day 2) Barriers to change-unhelpful thinking                 | CBT and Rational Emotive Therapy.[34,36]                                                   | Groups were encouraged to consider that reflexive, automatic thinking patterns may prevent individuals from achieving their goals.                                                |
| Component 11: (Day 2) Barriers to change-reframing negatives to positives   | Acceptance and commitment theory (ACT) [30-32] CBT and change management principles). [34] | Participants were asked to consider what they were able to do rather than what they were unable to do.                                                                            |
| Component 12: (Day 2) Attention control and distraction                     | Attention control and distraction techniques.[37]                                          | Participants were introduced to techniques that might enable them to focus their minds away from thoughts about pain.                                                             |

1  
2  
3  
4 A review of the existing literature indicated that few trials reported information on, or assessed intervention  
5  
6 integrity. We used the monitoring and assessment tools from three trials to inform the development of our  
7  
8 measures.[20,38,39] The learning outcomes outlined in the COPERS facilitator training course manual helped  
9  
10 us to design a provisional set of criteria to measure:

11  
12  
13 i) 'Adherence', a component specific measure was designed to assess the delivery of key elements as  
14  
15 described in the COPERS facilitators' manual.

16  
17  
18 ii) 'Competence', a generic competence measure was designed to determine the extent to which the facilitators  
19  
20 created an environment in which participants could share their experiences and learn new skills.

21  
22  
23 iii) 'Overall impression', this measure was designed to reflect the extent to which the aims and objectives of the  
24  
25 component were achieved and how the material was received by the group.

26  
27  
28 We tested a variety of scoring systems for adherence, competence and "overall impression" including:  
29  
30 dichotomous response categories, Likert and numeric scales, frequentist and occurrence/non-occurrence  
31  
32 methods. We tested inter-rater and intra-rater reliability and assessment efficiency. The research team revised  
33  
34 and amended the evaluation forms after piloting.

### 35 36 37 38 39 **Adherence measurement**

40  
41 The adherence evaluation form consisted of items that reflected the occurrence or non-occurrence of an event.  
42  
43 Component specific items, relating to the key elements prescribed in the COPERS facilitator's manual, formed  
44  
45 the basis of the assessment, We assessed 'Yes', element occurred / was delivered (scored two points), 'No',  
46  
47 element did not occur / was not delivered (zero points) and 'Unsure' (one point).

48  
49  
50 The number of adherence items varied between the different course components (Table 2). To ensure that all  
51  
52 scores from the components were standardised to a consistent scale we summed the 'raw scores' for each  
53  
54 component and divided them by the total number of items for that component. For example: component two  
55  
56 'Pain Information' had six adherence items with a maximum 'raw' score of twelve (6x2), the total aggregate six  
57  
58  
59  
60

1 item score for this component was divided by six. Thus a maximum (100%) score was two and a minimum  
2  
3 score zero.  
4  
5  
6

### 7 **Competence measurement**

8  
9 The competence evaluation form was generic, it consisted of items related to: the extent to which the  
10 facilitators introduced the aims/rationale of each component, the success or failure of the facilitators to  
11 generate group discussion and individual disclosure, whether the facilitators' consolidated and summarised  
12 participant learning at the end of each component and/or linked learning to other components in the COPERS  
13 course. Assessment was given as 'Yes'/ demonstrated' (scored two points), 'No'/ not demonstrated (scored  
14 zero points), and 'Unsure' (scored one point). The scores were also standardised by dividing the maximum  
15 'raw' score of eight by the number of items (i.e. four) thus represented by a maximum of two and a minimum  
16 score of zero.  
17  
18  
19  
20  
21  
22  
23  
24  
25  
26

### 27 **Overall impression rating**

28 We used a generic overall general impression scale ranging from one to four, anchored at one: 'did not go well'  
29 and four: 'excellent'.  
30  
31  
32  
33  
34

### 35 **Selection of components to be evaluated**

36 We used a random sampling grid to select four of the seven selected components on each course. Evaluators  
37 listened to each recorded component in its entirety and rated adherence, competence and overall impression  
38 using a specially designed evaluation form that enabled evaluators to provide supportive quotes and/or  
39 comments to justify their ratings.  
40  
41  
42  
43  
44  
45  
46  
47

48 A number of components could not be analysed due to equipment failure, facilitators omitting to turn recording  
49 equipment on, incomplete recording or poor sound quality; evaluators were instructed to substitute that  
50 component with the next available selected component from that course.  
51  
52  
53  
54

55 Members of the COPERS research team (DE, TM, KH) evaluated / assessed the audio recordings. To  
56 minimise bias team members evaluated courses they had not been involved in delivering.  
57  
58  
59  
60



### Inter-rater/intra-rater reliability

Ten percent of assessed component recordings totaling seventy one hours intervention time were tested for inter and intra-rater reliability. A third party (DC) reviewed the evaluation forms and selected a purposive 10 per cent sample of evaluations that reflected high and low adherence and competence ratings. These were used to assess reliability of the scoring methods. A period of at least two weeks between first and second evaluations was adopted for the intra-rater reliability testing. We assessed reliability using percentage agreement for each item rated on the evaluation forms.

### Results

Thirty one COPERS courses were delivered and components from every course were evaluated. We assessed 122 COPERS components. Due to missing recordings 2 courses were assessed on three rather than four components. A summary of the number of components sampled and evaluated is shown in Table 2.

**Table 2. Number of items scored for each component evaluated**

| Component              | Number of components evaluated | Adherence: items evaluated | Competence: items evaluated | Overall Impression: items evaluated |
|------------------------|--------------------------------|----------------------------|-----------------------------|-------------------------------------|
| 2: Pain information    | 16                             | 6                          | 4                           | 1                                   |
| 3: Acceptance          | 17                             | 3                          | 4                           | 1                                   |
| 5: Pain cycle          | 20                             | 6                          | 4                           | 1                                   |
| 9: Goal setting        | 19                             | 8                          | 4                           | 1                                   |
| 10: Unhelpful thoughts | 18                             | 6                          | 4                           | 1                                   |
| 11: Reframing          | 28                             | 5                          | 4                           | 1                                   |
| 12: Attention control  | 14                             | 6                          | 4                           | 1                                   |

The overall adherence, competence and impression scores are shown in Table 3. As the scores were not normally distributed the median and the Interquartile Range (IQR) is presented.

### Data analysis

## Adherence

Overall COPERS courses achieved the maximum course delivery adherence score (Median 2.00), however there were some component score variations (Table 3). The lowest levels of adherence were observed for component 10: Unhelpful Thinking (Median 1.67, IQR 1.67-2.00), and component 2: Pain Information (Median 1.75, IQR 1.42-2.00).

## Competence

Competence scores exhibited higher levels of variability than the adherence scores (Table 3). The overall course delivery competence score was a median of 1.5 (IQR 1.25-2.00). The highest level of competence was for component 5: Pain cycle (median 1.88, IQR 1.50-2.00) and the lowest for component 12: Attention Control (median 1.13, IQR 1.00-1.63).

## Overall impression scores

The median overall impression score for all courses was 3 (maximum 4, IQR 2.00-3.00). There was some component score variability (Table 3). Component 12: Attention Control had an overall impression score of two, reflecting the low facilitator competence scores for this component. Component 11: Reframing had a similarly low overall impression score of two (IQR 2.00-3.25) although it was delivered with the maximum score for adherence (Median 2, IQR 1.60-2.00) and good levels of competence (Median, 1.63, IQR 1.25-2.00).

**Table 3. Overall adherence competence and impression scores**

| Component              | Overall adherence |           | Overall competence |           | Overall impression |           |
|------------------------|-------------------|-----------|--------------------|-----------|--------------------|-----------|
|                        | Median scores     | IQR       | Median scores      | IQR       | Median scores      | IQR       |
| 2: Pain information    | <b>1.75</b>       | 1.42-2.00 | <b>1.75</b>        | 1.25-2.00 | <b>3.00</b>        | 3.00-3.00 |
| 3: Acceptance          | <b>2.00</b>       | 1.83-2.00 | <b>1.50</b>        | 1.00-2.00 | <b>3.00</b>        | 2.50-3.00 |
| 5: Pain cycle          | <b>2.00</b>       | 2.00-2.00 | <b>1.88</b>        | 1.50-2.00 | <b>3.00</b>        | 3.00-4.00 |
| 9: Goal setting        | <b>2.00</b>       | 2.00-2.00 | <b>1.50</b>        | 1.00-2.00 | <b>3.00</b>        | 2.00-3.00 |
| 10: Unhelpful thinking | <b>1.67</b>       | 1.67-2.00 | <b>1.50</b>        | 1.00-1.81 | <b>3.00</b>        | 2.00-3.00 |
| 11: Reframing          | <b>2.00</b>       | 1.60-2.00 | <b>1.63</b>        | 1.25-2.00 | <b>2.00</b>        | 2.00-3.25 |
| 12: Attention control  | <b>2.00</b>       | 1.67-2.00 | <b>1.13</b>        | 1.00-1.63 | <b>2.00</b>        | 1.75-3.00 |
| Overall course score   | <b>2.00</b>       | 1.67-2.00 | <b>1.50</b>        | 1.25-2.00 | <b>3.00</b>        | 2.00-3.00 |

### Inter-rater/intra-rater reliability

Percentage agreement scores measured inter-rater reliability. 15 COPERS components were used to measure inter-rater reliability, they comprised 95 adherence item scores, 71 competence item scores and 15 overall impression scores. Inter-rater agreement was 80% for adherence items, 67% for competence items and 53.5% for overall impression scores.

Intra-rater reliability was measured using assessments from 16 COPERS components comprising 94 adherence item scores, 64 competence item scores and 16 overall impression scores intra-rater reliability 91% for adherence items, 75.7% for competence items and 69% for overall impression scores.

## Discussion

The aim of this study was to develop a methodology to assess the level of intervention integrity achieved during the delivery of the COPERS self-management course in a randomized controlled trial setting. To our knowledge this is the most systematic and rigorous published evaluation of the intervention integrity of a complex, theory based behavior change intervention to date. Overall the results suggest that the COPERS course was delivered competently and as intended. We describe the opportunities, challenges, achievements and limitations of this work and discuss these in the context of the emerging science of fidelity assessment with regard to intervention integrity and make recommendations based on our experience which may assist other trialists evaluating complex interventions.

Our work supports the suggestion that effective adherence in complex interventions may involve more than the delivery of prescribed 'surface' content but also adherence to essential but non-content related 'core' theoretical/structural elements.[15] For example, component 10: 'Unhelpful Thinking' in the COPERS programme illustrates the challenges in defining adherence in complex interventions. This component was intended to help participants recognise and change patterns of automatic negative and self-limiting thoughts. The course manual outlined the informational content of this component, the structure, sequence, timing and mode of delivery of the various elements to be used by the facilitators. To deliver this component as prescribed a high level of adherence to both content and structure of the session was required. Component 10 had a relatively low adherence score which was primarily caused by the facilitators' difficulty in maintaining the complex structure of the tasks involved in this component rather than a failure to deliver the prescribed content. High levels of adherence to protocols may be associated with a mechanistic, inflexible or unresponsive delivery style and therefore associated with low levels of competence.[7] Conversely, sometimes facilitator 'failure' to deliver the component content as prescribed i.e. low adherence was directly related to low levels of competence. Parts of the course were designed to promote group participation, but if poorly sequenced or timed they often resulted in a didactic/mechanistic delivery style that inhibited rather than encouraged group disclosure and discussion.

1 Seemingly low levels of adherence however may not necessarily be associated with poor intervention delivery.  
2  
3 For example some facilitators deviated from instructions (and were by definition non-adherent) but these  
4  
5 deviations can be re-interpreted positively as the facilitators altered the delivery in response to individual or  
6  
7 group intervention receipt. Some of our facilitators subtly changed delivery from the prescribed content in the  
8  
9 manual but they still achieved the component's overall aims and objectives. This may be a demonstration of  
10  
11 high levels of facilitator competence despite being rated as non-adherent.[15] There is, as yet, little empirical  
12  
13 work that demonstrates the conditions that may influence adaptation or reinvention or whether, and in what  
14  
15 circumstances, these deviations from prescribed protocol may enhance outcomes or decrease  
16  
17 effectiveness.[17]  
18  
19  
20  
21  
22  
23

24 The monitoring and assessment of competence within the COPERS study illustrated the difficulties associated  
25  
26 with its measurement. Recent work has identified competence as a complex construct that includes: the ability  
27  
28 to establish collaborative relationships and form alliances with participants,[40] through the use of responsive  
29  
30 tailoring of programme content,[40] the pacing of delivery,[41] and the use of positive verbal and non-verbal  
31  
32 behaviours.[43]  
33  
34  
35  
36

37 The findings from the COPERS study support those who consider that levels of competence are more  
38  
39 sensitive to contextual factors than adherence.[7] The greater variability in our competence scores, compared  
40  
41 to those for adherence reflect, in part, the diversity of facilitator skills required to deliver the COPERS  
42  
43 programme and the recognised practical and methodological difficulties in measuring what may seem to be a  
44  
45 subjective concept.[7,20,24]  
46  
47  
48  
49  
50  
51

52 Our work supports the hypothesis that competence as a multidimensional construct. Effective intervention  
53  
54 delivery may be influenced and moderated by many factors such as: positive or negative individuals and or  
55  
56 groups, individual intervention receipt, component content, facilitator and co-facilitator coherence or  
57  
58 incoherence, issues related to the use of computer hardware and software, the venue, the distribution of hand-  
59  
60

1   outs, use of flip charts, the co-ordination and organisation of group activities, feedback and time management.  
2  
3   Experience also influences competence and we noted that our facilitators appeared to improve with each  
4  
5   course they conducted. Our ratings might also reflect the inexperience of the facilitators who were delivering a  
6  
7   new initiative.  
8  
9

10  
11  
12  
13   The overall impression measure was in part designed to reflect some of the 'non-facilitator determined' factors  
14  
15   not evaluated by the adherence and competence measures. This subjective measure assessed the extent to  
16  
17   which the component achieved its specific aims and was consistent with the goals of the wider programme.  
18  
19   The overall impression measure proved to be challenging to use and the data difficult to interpret. Evaluators  
20  
21   found it relatively straightforward to assess a component as either 'Excellent' or 'Did not go well', but the  
22  
23   intermediate scores were less reliable.  
24  
25  
26  
27  
28  
29

### 30   **Limitations**

31  
32  
33   Within the emerging science of fidelity assessment there is a recognition of the need for reliable measurement  
34  
35   instruments. [17,22] The varying levels of inter and intra rater reliability found in our work reflect the conceptual  
36  
37   and methodological difficulties of measuring interventionist behaviours at the point of program delivery. We  
38  
39   consider that our adherence, competence and overall impression measures are developmental and that in the  
40  
41   future the use of triangulated data from multiple sources and more differentiated, contextually sensitive  
42  
43   measures specifically designed for complex interventions may prove to be of great value. We used audio  
44  
45   recordings to evaluate the components but it is doubtful if sound recordings alone can capture the subtleties of  
46  
47   facilitator competence involving non-verbal behaviours, the dynamics of both facilitators and individual and  
48  
49   group interactions. Although the assessment of adherence and competence was carried out by evaluators not  
50  
51   directly involved in the delivery of each assessed component the overall evaluation of the COPERS  
52  
53   intervention was conducted by members of the study team and this may have led to bias. The adherence  
54  
55   measures were designed to assess the fundamental requirements of course delivery, however the use of a  
56  
57   generic competence measure may not have reflected the range of skills required to deliver the various course  
58  
59  
60

1 components. The absence of standardised definitions and the lack of valid and reliable measures of adherence  
2  
3 and competence made assessments of the impact on outcomes difficult.[20]  
4  
5  
6  
7

## 8 **Lessons learned**

9

10  
11 Our experience of assessing fidelity enabled us to gain valuable insights which may be of use to others  
12  
13 evaluating the fidelity of complex interventions, these are summarised in Table 4.  
14  
15  
16  
17  
18  
19

### 20 **Table 4. Insights / key messages on the application of a standardised approach to evaluate** 21 **intervention integrity.**

22  
23  
24  
25  
26

- |                                                                                                                                                                                                                                                                                                                                                                                                                                                                                                                                                                                                                                                                                                                                                                                                                                                                                                                                                                                                                                                                                                                                                                                                                                                                                                                                                                                                                                                                                          |
|------------------------------------------------------------------------------------------------------------------------------------------------------------------------------------------------------------------------------------------------------------------------------------------------------------------------------------------------------------------------------------------------------------------------------------------------------------------------------------------------------------------------------------------------------------------------------------------------------------------------------------------------------------------------------------------------------------------------------------------------------------------------------------------------------------------------------------------------------------------------------------------------------------------------------------------------------------------------------------------------------------------------------------------------------------------------------------------------------------------------------------------------------------------------------------------------------------------------------------------------------------------------------------------------------------------------------------------------------------------------------------------------------------------------------------------------------------------------------------------|
| <p>27 i) Evaluation of interventions is dependent on the <i>a priori</i> formulation of adherence and<br/>28 competence criteria based on the theoretical underpinnings, aims and content of the intervention.<br/>29</p> <p>30 ii) Adherence and competence criteria should be considered during the intervention design, inform<br/>31 the training for those delivering the intervention and should be incorporated into program manuals<br/>32 and supporting materials.<br/>33</p> <p>34 iii) Evaluation of intervention integrity requires a sophisticated understanding of the intervention.<br/>35 Comprehensive and cost-effective fidelity assessor/evaluator training can be provided alongside<br/>36 trainee interventionists within course delivery training programs.<br/>37</p> <p>38 iv) Evaluation of competence optimally requires data from multiple sources such as audio and<br/>39 video recordings, self-report and independent observation.<br/>40</p> <p>41 v) The comprehensive evaluation of competence requires the creation of measures that are<br/>42 sensitive to the complexity of the construct and take into account the intervention specific<br/>43 contextual variables that influence it.<br/>44</p> <p>45 vi) Levels of intervention integrity may vary over time. To ensure a valid assessment of<br/>46 intervention integrity it should be assessed systematically throughout the delivery phase of a trial.<br/>47<br/>48<br/>49<br/>50</p> |
|------------------------------------------------------------------------------------------------------------------------------------------------------------------------------------------------------------------------------------------------------------------------------------------------------------------------------------------------------------------------------------------------------------------------------------------------------------------------------------------------------------------------------------------------------------------------------------------------------------------------------------------------------------------------------------------------------------------------------------------------------------------------------------------------------------------------------------------------------------------------------------------------------------------------------------------------------------------------------------------------------------------------------------------------------------------------------------------------------------------------------------------------------------------------------------------------------------------------------------------------------------------------------------------------------------------------------------------------------------------------------------------------------------------------------------------------------------------------------------------|
- 51  
52  
53

## 54 **Conclusions**

55

56 We are confident that the COPERS intervention was delivered with high levels of adherence good levels of  
57  
58 competence and that the programme aims were largely achieved and therefore we anticipate that our outcome  
59  
60

1 data will not be influenced by poor intervention delivery. In this paper we presented a method for assessing  
2 adherence and competence and demonstrated its use in a large pragmatic RCT but we agree with the MRC  
3 that more work is necessary to ensure that the growth of complex interventions is accompanied by more robust  
4 systems of evaluation.  
5  
6  
7  
8

### 9 10 11 **Author affiliations**

12  
13  
14 <sup>1,3,4,6</sup> Centre for Primary Care and Public Health, Blizard Institute, Barts and The London School of Medicine  
15 and Dentistry, Yvonne Carter Building, 58 Turner Street, London. E1 2AB.

16  
17  
18 <sup>2</sup> Clinical Trials Unit, Warwick Medical School, University of Warwick, Coventry. CV4 7AL.

19  
20  
21 <sup>6</sup> Division of Health Sciences, Warwick Medical School, University of Warwick, Coventry. CV4 7AL.  
22  
23  
24

25 **Contributors** MU, DC and ST conceived the original idea for the COPERS study. DE wrote the fidelity protocol  
26 with input from DC, KH, MU, TM and ST. DC, DE, KH and TM evaluated intervention integrity. TM wrote the  
27 first draft of this paper, DC, DE, KH, MU, ST contributed to each successive draft of the manuscript.  
28  
29  
30  
31  
32  
33

34 **Funding** This paper presents independent research commissioned by the National Institute for Health  
35 Research (NIHR) under its Programme Grants for Applied Research scheme (RP-PG-0707-10189). The views  
36 expressed in this publication are those of the authors and not necessarily those of the NHS, the NIHR or the  
37 Department of Health. This project benefitted from facilities funded through the Birmingham Science City  
38 Translational Medicine Clinical Research and Infrastructure Trials platform, with support from Advantage West  
39 Midlands.  
40  
41  
42  
43  
44  
45  
46  
47  
48

49 **Competing interests** None  
50  
51  
52

53 **Ethics approval** Ethics approval was given by Cambridge Ethics Committee 11/EE/046.  
54  
55

56 Trial registration: ISRCTN24426731  
57  
58  
59  
60



1 **Provenance and peer review** Not commissioned; internally peer reviewed.  
2  
3  
4

5 **References**  
6  
7

- 8 1. Michie S, Fixsen D, Grimshaw JM, et al. Specifying and reporting complex behaviour change  
9 interventions: the need for a scientific method. *Implementation Science* 2009,4:40.  
10  
11
- 12 2. Medical Research Council: Developing and Evaluating Complex Interventions: New Guidance. London.  
13  
14 2008.  
15  
16  
17
- 18 3. Bellg AJ, Borrelli B, Resnick B, et al. Enhancing treatment fidelity in health behavior change studies:  
19 best practices and recommendations from the NIH Behavior Change Consortium. *Health Psychology*  
20  
21 2004,23(5):443-451.  
22  
23  
24
- 25 4. Yeaton WH, Sechrest L. Critical dimensions in the choice and maintenance of successful treatments:  
26 strength, integrity, and effectiveness. *Journal of consulting and clinical psychology* 1981,49(2):156-167.  
27  
28  
29
- 30 5. Moncher FJ, Prinz R. Treatment Fidelity in Outcome Studies. *Clinical Psychology Review* 1991,  
31  
32 11:247-266.  
33  
34  
35
- 36 6. Basch CE, Sliepcevich EM, Gold RS, Duncan DF, Kolbe LJ. Avoiding Type Three Errors in Health  
37  
38 Education Program Calculations: A Case Study. *Health Education Quarterly* 1985,12:315-31.  
39  
40  
41
- 42 7. Waltz J, Addis ME, Koerner K, Jacobson NS. Testing the integrity of a psychotherapy protocol:  
43  
44 assessment of adherence and competence. *Journal of consulting and clinical psychology*  
45  
46 1993,61(4):620-630.  
47  
48  
49
- 50 8. Mihalic SF. The Importance of Implementation Fidelity. Violence Prevention Initiative. Boulder,  
51  
52  
53  
54  
55  
56  
57  
58  
59  
60

- 1 Colorado; 2002.
- 2
- 3
- 4
- 5 9. Elliot D, Mihalic S. Issues in disseminating and replicating effective prevention programs. *Prevention*
- 6
- 7 *Science* 2004,5:47-53.
- 8
- 9
- 10
- 11
- 12 10. Noel P. The impact of therapeutic case management on participation in adolescent substance abuse
- 13
- 14 treatment. *American Journal of Alcohol Abuse* 2006,13:311-327.
- 15
- 16
- 17
- 18 11. Thomas RE, Baker P, Lorenzetti D. Family-based programmes for preventing smoking by children and
- 19
- 20 adolescents. *Cochrane Systematic Review* CD004493. 2007.
- 21
- 22
- 23
- 24
- 25 12. Perepletchikova F, Kazdin A. Treatment Integrity and Therapeutic Change:
- 26
- 27 Issues and Research Recommendations. *Clinical Psychological Practice* 2005,12:365-383.
- 28
- 29
- 30
- 31 13. Steckler A, Linnan L, eds. *Process Evaluation for Public Health interventions and Research*. San
- 32
- 33 Francisco: Wiley (Jossey-Bass); 2002.
- 34
- 35
- 36
- 37
- 38 14. Borrelli B, Sepinwall D, Ernst D, et al. A new tool to assess treatment fidelity and evaluation of
- 39
- 40 treatment fidelity across 10 years of health behavior research. *Journal of consulting and clinical*
- 41
- 42 *psychology* 2005,73(5):852-860.
- 43
- 44
- 45
- 46 15. Durlak JA, Du Pre EP. Implementation matters: a review of research on the influence of implementation
- 47
- 48 on program outcomes and the factors affecting implementation. *Am J Community Psychology*
- 49
- 50 2008,41(3-4):327-350.
- 51
- 52
- 53
- 54
- 55 16. Hulscher ME, Laurant MG, Grol RP. Process evaluation on quality improvement interventions. *Quality*
- 56
- 57 *Safety and Health Care* 2003,12(1):40-46.
- 58
- 59
- 60

- 1  
2  
3 17. Dusenbury L, Brannigan R, Falco M, et al. A review of research on fidelity of implementation:  
4 implications for drug abuse prevention in school settings. *Health Education Res* 2003,18(2):237-256.  
5  
6  
7  
8  
9  
10 18. Carroll C, Patterson M, Wood S, et al. A conceptual framework for implementation fidelity. *Implement*  
11 *Science* 2007,2:40.  
12  
13  
14  
15  
16 19. Gearing RE, El-Bassel N, Ghesquiere A, et al. Major ingredients of fidelity: a review and scientific guide  
17 to improving quality of intervention research implementation. *Clinical Psychology Rev* 2011,31(1):79-88.  
18  
19  
20  
21  
22 20. Cross WF, West JC. Examining implementer fidelity: Conceptualizing and measuring adherence and  
23 competence. *J Child Serv* 2011,6(1):18-33.  
24  
25  
26  
27  
28  
29 21. Mihalic SF, Argamaso S. Implementing the Life Skills training drug prevention program: factors related  
30 to implementation fidelity. *Implementation Science* 2008,3(5).  
31  
32  
33  
34  
35  
36 22. Parham LD, Cohn ES, E, Spitzer S, et al. Development of a fidelity measure for research on the  
37 effectiveness of the Ayres Sensory Integration intervention. *Am J Occup Ther* 2011, 65(2):133-142.  
38  
39  
40  
41  
42 23. Borrelli B. The Assessment, Monitoring, and Enhancement of Treatment Fidelity In Public Health  
43 Clinical Trials. *J Public Health Dent* 2011,71(s1):S52-S63.  
44  
45  
46  
47  
48  
49 24. Stiles WB, Honos-Webb L, Surko M. Responsiveness in psychotherapy. *Clinical Psychology: Science*  
50 *and Practice* 1998, 5(4):438-458.  
51  
52  
53  
54  
55 25. Barber JP, Mercer D, Krakauer I, et al. Development of an adherence/competence rating scale for  
56 individual drug counselling. *Drug Alcohol Depend* 1996,43(3):125-132.  
57  
58  
59  
60

- 1 26. Castonguay LG, Goldfried M, Wiser SRP, et al. Predicting the effect of cognitive therapy for depression:  
2  
3 a study of unique and common factors. *Journal of consulting and clinical psychology* 1996,64(3):497-  
4  
5 504.  
6  
7  
8  
9  
10 27. Huey SJ Jr, Henggeler SW, Melton GB, et al. Mechanisms of change in multisystemic therapy: reducing  
11  
12 delinquent behavior through therapist adherence and improved family and peer functioning. *Journal of*  
13  
14 *consulting and clinical psychology* 2000,68(3):451-467.  
15  
16  
17  
18 28. Barber JP, Crits-Christoph P, Luborsky L. Effects of therapist adherence and competence on patient  
19  
20 outcome in brief dynamic therapy. *Journal of consulting and clinical psychology* 1996, 64(3):619-622.  
21  
22  
23  
24 29. Henggeler SW, Rowland MD, Pickrel SG, et al. Investigating family-based alternatives to institution-  
25  
26 based mental health services for youth: lessons learned from the pilot study of a randomized field trial.  
27  
28 *J Clin Child Psychol* 1997,26(3):226-233.  
29  
30  
31  
32  
33 30. Hayes SC, Strosahl KD, Wilson KG. Acceptance and Commitment Therapy: An Experiential Approach  
34  
35 to Behaviour Change: Guilford Press; 2004.  
36  
37  
38  
39 31. Hayes SC, Smith SX. Get Out of Your Mind and into Your Life: The New Acceptance and Commitment  
40  
41 Therapy. New Harbinger Publications; 2005.  
42  
43  
44  
45  
46 32. McCracken LM, Vowles KE, Eccleston C: Acceptance of chronic pain: component analysis and a  
47  
48 revised assessment method. *Pain* 2004,107(1-2):159-166.  
49  
50  
51  
52  
53 33. Vlaeyen JW, Linton SJ. Fear-avoidance and its consequences in chronic musculoskeletal pain: a state  
54  
55 of the art. *Pain* 2000,85(3):317-332.  
56  
57  
58  
59 34. Beck JS. Cognitive Therapy. New York: The Guildford Press; 1995.  
60

- 1  
2  
3 35. Bandura A. Social Foundations of Thought and Action: A Social Cognitive Theory. Pearson  
4 Education;1986.  
5  
6  
7  
8  
9  
10 36. Ellis A, Dryden W. The Practice of Rational Emotive Behavior therapy. 2nd ed: Springer Publishing;  
11 2007.  
12  
13  
14  
15  
16 37. Morley S, Shapiro DA, Biggs J. Developing a treatment manual for attention management in chronic  
17 pain. *Cognitive Behaviour Therapy* 2004,33(1):1-11.  
18  
19  
20  
21  
22  
23 38. Carroll KM, Nich C, Rounasville BJ. Use of observer and therapist ratings to monitor delivery of coping  
24 skills treatment for cocaine abusers: utility of therapist session checklists. *Psychotherapy Research*  
25 1998,8:307-320.  
26  
27  
28  
29  
30  
31 39. Carroll KM, Nich C, Sifry RL, et al. A general system for evaluating therapist adherence and  
32 competence in psychotherapy research in the addictions. *Drug and Alcohol Dependence*  
33 2000,57(3):225-238.  
34  
35  
36  
37  
38  
39  
40 40. Creed TA, Kendall PC. Therapist alliance-building behavior within a cognitive-behavioral treatment for  
41 anxiety in youth. *Journal of consulting and clinical psychology* 2005,73(3):498-505.  
42  
43  
44  
45  
46 41. Davidson K, Scott J, Schmidt U, et al. Therapist competence and clinical outcome in the Prevention of  
47 Parasuicide by Manual Assisted Cognitive Behaviour Therapy trial: the POPMACT study. *Psychol Med*  
48 2004,34(5):855-863.  
49  
50  
51  
52  
53  
54  
55  
56  
57 42. Lochman JE, Boxmeyer C, Powell N, et al. Dissemination of the Coping Power program: importance of  
58 intensity of counselor training. *Journal of consulting and clinical psychology* 2009,77(3):397-409.  
59  
60

1  
2  
3  
4  
5  
6  
7  
8  
9  
10  
11  
12  
13  
14  
15  
16  
17  
18  
19  
20  
21  
22  
23  
24  
25  
26  
27  
28  
29  
30  
31  
32  
33  
34  
35  
36  
37  
38  
39  
40  
41  
42  
43  
44  
45  
46  
47  
48  
49  
50  
51  
52  
53  
54  
55  
56  
57  
58  
59  
60

43. Crowe TP, Grenyer BFS. Is therapist alliance or whole group cohesion more influential in group psychology outcomes? *Clinical Psychology and Psychotherapeutics* 2008,15:239-246.

For peer review only

1  
2  
3 **Title: Fidelity in complex behaviour change interventions: a standardised approach to evaluate**  
4  
5 **intervention integrity.**  
6  
7

8  
9  
10 **Authors:**

11  
12 1)\* Mr. Tom Mars, Researcher, Centre for Primary Care and Public Health, Blizard Institute, Barts and  
13 The London School of Medicine and Dentistry, Yvonne Carter Building, 58 Turner Street, London. E1  
14 2AB. [t.s.mars@qmul.ac.uk](mailto:t.s.mars@qmul.ac.uk)  
15

16  
17 2) Dr. David Ellard, Senior Research Fellow, Clinical Trials Unit (T0.10), Warwick Medical school,  
18 University of Warwick, Coventry. CV4 7AL. [D.R.Ellard@warwick.ac.uk](mailto:D.R.Ellard@warwick.ac.uk).

19  
20 3) Dr. Dawn Carnes, Senior Researcher and COPERS Study Manager, Centre for Primary Care and  
21 Public Health, Blizard Institute, Barts and The London School of Medicine and Dentistry, Yvonne Carter  
22 Building, 58 Turner Street, London. E1 2AB. [d.carnes@qmul.ac.uk](mailto:d.carnes@qmul.ac.uk).  
23

24  
25 4) Ms. Kate Homer, Senior Researcher, Centre for Primary Care and Public Health, Blizard Institute,  
26 Barts and The London School of Medicine and Dentistry, Yvonne Carter Building, 58 Turner Street,  
27 London. E1 2AB. [k.homer@qmul.ac.uk](mailto:k.homer@qmul.ac.uk).

28  
29 5) Professor Martin Underwood, Professor of Primary Care Research, Head of Division, Division of  
30 Health Sciences, Warwick Medical School, University of Warwick, Coventry. CV4 7AL.  
31 [M.Underwood@warwick.ac.uk](mailto:M.Underwood@warwick.ac.uk).

32  
33 6) Professor Stephanie J.C. Taylor, Professor in Public Health and Primary Care, Centre for Primary  
34 Care and Public Health, Blizard Institute, Barts and The London School of Medicine and Dentistry,  
35 Yvonne Carter Building, 58 Turner Street, London. E1 2AB. [s.j.c.taylor@qmul.ac.uk](mailto:s.j.c.taylor@qmul.ac.uk).  
36

37  
38 \*corresponding author  
39

40  
41 **Keywords: Complex interventions, Fidelity, Treatment Integrity**  
42  
43

44  
45 Word count: 3777  
46  
47  
48  
49  
50  
51  
52  
53  
54  
55  
56  
57  
58  
59  
60

**Abstract**

**Objectives:** The aim of this study was to a) demonstrate the development and testing of tools and procedures designed to monitor and assess the integrity of a complex intervention for chronic pain (COPERS self-management course); and b) make recommendations based on our experiences.

**Design:** Fidelity assessment of a two arm randomised controlled trial intervention, assessing adherence and competence of the facilitators delivering the intervention.

**Setting:** The intervention was delivered in the community in two centres in the UK: one inner city and one a mix of rural and urban locations.

**Participants:** 403 people with chronic musculoskeletal pain were enrolled in the intervention arm and 300 attended the self-management course. Thirty lay and healthcare professionals were trained and 24 delivered the courses (two per course). We ran 31 courses for up to 16 people per course all were audio recorded.

**Interventions:** The course was run over three and a half days; facilitators delivered a semi-structured manualised course.

**Outcomes:** We designed three measures to evaluate fidelity assessing adherence to the manual, competence and overall impression.

**Results:** We evaluated a random sample of four components from each course (n=122). The evaluation forms were reliable and had good face validity. There were high levels of adherence in the delivery, overall adherence was two (maximum 2, IQR 1.67-2.00), facilitator competence exhibited more variability, overall competence was 1.5 (maximum 2, IQR 1.25-2.00). Overall impression was three (maximum 4, IQR 2.00-3.00).

**Conclusions:** Monitoring and assessing adherence and competence at the point of intervention delivery can be realised most efficiently by embedding the principles of fidelity measurement within the design stage of complex interventions and the training and assessment of those delivering the intervention. More work is necessary to ensure more robust systems of fidelity evaluation accompany the growth of complex interventions.

**Trial Registration:** ISRCTN No: ISRCTN24426731

**Keywords:** Complex interventions, Fidelity, Treatment Integrity



## Article summary

### Article focus

We outline the procedures for assessing the intervention integrity of a self-management intervention for chronic musculoskeletal pain.

### Key messages

The robust evaluation of intervention integrity is dependent on the *a priori* formulation of criteria based on the theoretical underpinnings, aims and content of the intervention.

Adherence and competence criteria should inform the training for those delivering the intervention and incorporated into programme manuals and supporting materials.

The evaluation of intervention integrity requires assessors who are trained and have a sophisticated understanding of the intervention.

### Strengths and limitations of this study

To our knowledge our work is the most systematic and rigorous evaluation of the intervention integrity of a complex behavior change intervention to date.

The lack of valid and reliable measures of adherence and competence make the assessment of their impact on outcomes difficult.

## Background

Tackling the challenges posed by chronic illness requires initiatives focussed on changing individual behaviour.[1] This has resulted in the proliferation of interventions of increasing complexity. Complex interventions have multiple interacting components and are recognised in Medical Research Council (MRC) guidance as having varied and challenging issues in their design, evaluation and implementation. [2] This guidance recognises that intervention fidelity is under-evaluated. Intervention fidelity is defined as the use of methodological strategies to monitor and enhance the reliability (i.e. the consistency) and validity (i.e. the appropriateness) of behavioural programmes.[3]

The construct of 'intervention fidelity' originated from concerns about the 'treatment integrity' of psychotherapeutic interventions expressed in the 1980s and 90s.[4,5,7] The monitoring, measurement and assessment of intervention fidelity is important as it has been demonstrated that fidelity is a mediator of study outcomes.[8-11] The analysis of intervention fidelity can provide explanations of research findings [5,12] for example where interventions lack impact, this may reflect implementation failure rather than genuine ineffectiveness.[2] **The assessment of intervention fidelity is significant in the maintenance of both internal and external validity. Internal validity may be compromised by 'Type III errors' [6] that arise from the evaluation of a program that has been inadequately implemented. External validity may be improved by rigorous fidelity assessment that facilitates treatment replication across studies and assists the evaluation and development of treatments in applied settings.**

In the last twenty years, the notion of intervention fidelity has become increasingly differentiated and multi-layered.[13-15] There is an emerging science of intervention fidelity, relating to complex interventions presenting researchers with a number of conceptual, methodological and operational challenges.[16-20] There is an on-going debate about how core elements of fidelity are defined and measured [8,17,21] and a recognition of the need for reliable fidelity measurement instruments.[17,22]

1 There is little consensus about the key elements that contribute to intervention fidelity, possibly because it is a  
2 multidimensional construct.[13] Recent work has identified five domains of fidelity: study design, training,  
3 intervention delivery, intervention receipt by participants and intervention enactment, defined as the extent to  
4 which participants apply the skills learned.[14, 23]  
5  
6  
7  
8  
9

10 In this paper we focus on the domain of intervention delivery or integrity, defined as the monitoring and  
11 assessment of behaviours at the point of intervention delivery. Intervention integrity is often considered to be  
12 the heart of fidelity.[19] The effectiveness of complex interventions may be dependent on the 'skills' of those  
13 delivering them.[20] 'Skills' can be characterised by separate but related constructs of adherence and  
14 competence. Adherence is defined as: the extent to which a person delivers the essential content, delivery  
15 strategies and theories prescribed by the intervention designers and avoids activities proscribed by them.  
16  
17 Competence refers to the level of 'skill' demonstrated by those delivering an intervention and may include the  
18 ability to respond appropriately to a wide variety of contextual cues. Competence is less likely to be assessed  
19 than adherence.[19] This may be a reflection of the on-going debate surrounding the definition of competence  
20 and 'skill',[7] the methodological difficulties surrounding the monitoring and measurement of competence,[24]  
21 and the significant expenditure of time and resource required collect and analyse competence data.[7]  
22  
23  
24  
25  
26  
27  
28  
29  
30  
31  
32  
33  
34  
35  
36

37 The association between levels of adherence and levels of competence is unclear,[12, 26] and the impact of  
38 varying levels of adherence on outcomes is unresolved. Some studies have concluded that high levels of  
39 adherence may reflect a lack of flexibility and compromise outcomes,[26] however others have concluded that  
40 high levels of adherence are associated with improved outcomes.[25, 28] This suggests that the relationship  
41 between outcomes and adherence is not linear, and that flexibility and deviation from predefined protocols may  
42 result in lower levels of adherence but produce optimal results.  
43  
44  
45  
46  
47  
48  
49  
50  
51

52 It has been argued that that the significant resource costs of maintaining a high level of vigilance in treatment  
53 fidelity are more than outweighed by the scientific, economic and stakeholder consequences of disseminating  
54 inadequately tested interventions or of implementing potentially effective programmes poorly.[3, 14, 29] Recent  
55  
56  
57  
58  
59  
60

1 evidence suggests that the assessment of intervention fidelity is not being conducted widely or  
2  
3 systematically.[1,14,19]  
4  
5  
6

7 The aim of this study was to a) demonstrate the development and testing of tools and procedures designed to  
8 monitor and assess the intervention integrity of a complex intervention for chronic pain (COPERS self-  
9 management course); and b) make recommendations based on our experiences.  
10  
11  
12  
13

## 14 15 16 17 **Methods**

### 18 19 20 **The COPERS study**

21  
22  
23 The **CO**ping with persistent **Pain**, **E**ffectiveness **R**esearch into **S**elf-management (COPERS) is a complex  
24 behaviour change intervention. It is a self-management course aimed at enabling participants living with long-  
25 term musculoskeletal pain to improve the quality of their lives. COPERS is a three day course run for groups of  
26 between eight and sixteen people. Specifically trained facilitators, one a healthcare professional and one a lay  
27 facilitator with experience of living with long term pain conduct the groups. We tested the course's  
28 effectiveness in randomised controlled trial (RCT) (ISRCTN 24426731). As part of the trial we developed,  
29 tested and implemented a methodology to assess the intervention integrity of the COPERS course as it was  
30 delivered to trial participants. In this paper we describe how we assessed fidelity, the challenges we  
31 encountered measuring integrity, competence and adherence. We discuss these and provide  
32 recommendations based on our experience to help inform others undertaking fidelity assessment of complex  
33 interventions.  
34  
35  
36  
37  
38  
39  
40  
41  
42  
43  
44  
45  
46  
47  
48  
49  
50

### 51 **Data collection**

52  
53 All the 32 COPERS courses were audio recorded with the consent of participants and these recordings were  
54 used to assess and evaluate intervention integrity.  
55  
56  
57  
58  
59  
60

## Developing the intervention integrity measures

After piloting, but prior to delivery of the trial, we identified seven of 24 course components that were based on key cognitive behavioural elements relating to the theoretical foundations of the COPERS intervention, and which we considered to be the most likely to effect participant behaviour change. These components focussed on participant education and theoretically driven behaviour change techniques and strategies in contrast to other components that encouraged social interaction, relaxation and postural awareness. Intervention integrity was assessed via our audio-recordings of the components listed in Table 1.

**Table 1. Components evaluated**

| Component                                                                   | Theoretical bases                                                                          | Component Description                                                                                                                                                             |
|-----------------------------------------------------------------------------|--------------------------------------------------------------------------------------------|-----------------------------------------------------------------------------------------------------------------------------------------------------------------------------------|
| Component 2: (Day 1) Pain information                                       | Acceptance and commitment theory (ACT).[30-32]                                             | Participants watched a DVD aimed at educating them about chronic pain and introducing them, through facilitated discussion, to the notion of acceptance of their pain.            |
| Component 3: (Day 1) Acceptance                                             | Acceptance and commitment theory (ACT).[30-32]                                             | Participants were asked to consider a scenario about an uninvited/unwanted guest as a metaphor for their pain.                                                                    |
| Component 5: (Day 1) The pain cycle                                         | Fear avoidance model.[33]                                                                  | Groups were introduced to the pain cycle and the varied and individual emotions and behaviours that may perpetuate that cycle.                                                    |
| Component 9: (Day 2) Identifying problems, goal setting and action planning | Cognitive behavioural therapy (CBT) and theories of reasoned action/behaviour.[34,35]      | Groups were introduced to strategies to enable them to systematically identify problems, brainstorm creative solutions, set goals and devise strategies to escape the pain cycle. |
| Component 10: (Day 2) Barriers to change-unhelpful thinking                 | CBT and Rational Emotive Therapy.[34,36]                                                   | Groups were encouraged to consider that reflexive, automatic thinking patterns may prevent individuals from achieving their goals.                                                |
| Component 11: (Day 2) Barriers to change-reframing negatives to positives   | Acceptance and commitment theory (ACT) [30-32] CBT and change management principles). [34] | Participants were asked to consider what they were able to do rather than what they were unable to do.                                                                            |
| Component 12: (Day 2) Attention control and distraction                     | Attention control and distraction techniques.[37]                                          | Participants were introduced to techniques that might enable them to focus their minds away from thoughts about pain.                                                             |

1  
2  
3  
4 A review of the existing literature indicated that few trials reported information on, or assessed intervention  
5  
6 integrity. We used the monitoring and assessment tools from three trials to inform the development of our  
7  
8 measures.[20,38,39] The learning outcomes outlined in the COPERS facilitator training course manual helped  
9  
10 us to design a provisional set of criteria to measure:

11  
12  
13 i) 'Adherence', a component specific measure was designed to assess the delivery of key elements as  
14  
15 described in the COPERS facilitators' manual.

16  
17  
18 ii) 'Competence', a generic competence measure was designed to determine the extent to which the facilitators  
19  
20 created an environment in which participants could share their experiences and learn new skills.

21  
22  
23 iii) 'Overall impression', this measure was designed to reflect the extent to which the aims and objectives of the  
24  
25 component were achieved and how the material was received by the group.

26  
27  
28 We tested a variety of scoring systems for adherence, competence and "overall impression" including:  
29  
30 dichotomous response categories, Likert and numeric scales, frequentist and occurrence/non-occurrence  
31  
32 methods. We tested inter-rater and intra-rater reliability and assessment efficiency. The research team revised  
33  
34 and amended the evaluation forms after piloting.

### 35 36 37 38 39 **Adherence measurement**

40  
41 The adherence evaluation form consisted of items that reflected the occurrence or non-occurrence of an event.  
42  
43 Component specific items, relating to the key elements prescribed in the COPERS facilitator's manual, formed  
44  
45 the basis of the assessment, We assessed 'Yes', element occurred / was delivered (scored two points), 'No',  
46  
47 element did not occur / was not delivered (zero points) and 'Unsure' (one point).

48  
49  
50 The number of adherence items varied between the different course components (Table 2). To ensure that all  
51  
52 scores from the components were standardised to a consistent scale we summed the 'raw scores' for each  
53  
54 component and divided them by the total number of items for that component. For example: component two  
55  
56 'Pain Information' had six adherence items with a maximum 'raw' score of twelve (6x2), the total aggregate six  
57  
58  
59  
60

1 item score for this component was divided by six. Thus a maximum (100%) score was two and a minimum  
2  
3 score zero.  
4  
5  
6

### 7 **Competence measurement**

8  
9  
10 The competence evaluation form was generic, it consisted of items related to: the extent to which the  
11  
12 facilitators introduced the aims/rationale of each component, the success or failure of the facilitators to  
13  
14 generate group discussion and individual disclosure, whether the facilitators' consolidated and summarised  
15  
16 participant learning at the end of each component and/or linked learning to other components in the COPERS  
17  
18 course. Assessment was given as 'Yes'/ demonstrated' (scored two points), 'No'/ not demonstrated (scored  
19  
20 zero points), and 'Unsure' (scored one point). The scores were also standardised by dividing the maximum  
21  
22 'raw' score of eight by the number of items (i.e. four) thus represented by a maximum of two and a minimum  
23  
24 score of zero.  
25  
26

### 27 **Overall impression rating**

28  
29  
30 We used a generic overall general impression scale ranging from one to four, anchored at one: 'did not go well'  
31  
32 and four: 'excellent'.  
33  
34

### 35 **Selection of components to be evaluated**

36  
37  
38 We used a random sampling grid to select four of the seven selected components on each course. Evaluators  
39  
40 listened to each recorded component in its entirety and rated adherence, competence and overall impression  
41  
42 using a specially designed evaluation form that enabled evaluators to provide supportive quotes and/or  
43  
44 comments to justify their ratings.  
45  
46

47  
48 A number of components could not be analysed due to equipment failure, facilitators omitting to turn recording  
49  
50 equipment on, incomplete recording or poor sound quality; evaluators were instructed to substitute that  
51  
52 component with the next available selected component from that course.  
53  
54

55 Members of the COPERS research team (DE, TM, KH) evaluated / assessed the audio recordings. To  
56  
57 minimise bias team members evaluated courses they had not been involved in delivering.  
58  
59  
60

## Inter-rater/intra-rater reliability

Ten percent of assessed component recordings totaling seventy one hours intervention time were tested for inter and intra-rater reliability. A third party (DC) reviewed the evaluation forms and selected a purposive 10 per cent sample of evaluations that reflected high and low adherence and competence ratings. These were used to assess reliability of the scoring methods. A period of at least two weeks between first and second evaluations was adopted for the intra-rater reliability testing. We assessed reliability using percentage agreement for each item rated on the evaluation forms.

## Results

Thirty one COPERS courses were delivered and components from every course were evaluated. We assessed 122 COPERS components. Due to missing recordings 2 courses were assessed on three rather than four components. A summary of the number of components sampled and evaluated is shown in Table 2.

**Table 2. Number of items scored for each component evaluated**

| Component              | Number of components evaluated | Adherence: items evaluated | Competence: items evaluated | Overall Impression: items evaluated |
|------------------------|--------------------------------|----------------------------|-----------------------------|-------------------------------------|
| 2: Pain information    | 16                             | 6                          | 4                           | 1                                   |
| 3: Acceptance          | 17                             | 3                          | 4                           | 1                                   |
| 5: Pain cycle          | 20                             | 6                          | 4                           | 1                                   |
| 9: Goal setting        | 19                             | 8                          | 4                           | 1                                   |
| 10: Unhelpful thoughts | 18                             | 6                          | 4                           | 1                                   |
| 11: Reframing          | 28                             | 5                          | 4                           | 1                                   |
| 12: Attention control  | 14                             | 6                          | 4                           | 1                                   |

The overall adherence, competence and impression scores are shown in Table 3. As the scores were not normally distributed the median and the **Interquartile Range (IQR)** is presented.

## Data analysis



## Adherence

Overall COPERS courses achieved the maximum course delivery adherence score (Median 2.00), however there were some component score variations (Table 3). The lowest levels of adherence were observed for component 10: Unhelpful Thinking (Median 1.67, IQR 1.67-2.00), and component 2: Pain Information (Median 1.75, IQR 1.42-2.00).

## Competence

Competence scores exhibited higher levels of variability than the adherence scores (Table 3). The overall course delivery competence score was a median of 1.5 (IQR 1.25-2.00). The highest level of competence was for component 5: Pain cycle (median 1.88, IQR 1.50-2.00) and the lowest for component 12: Attention Control (median 1.13, IQR 1.00-1.63).

## Overall impression scores

The median overall impression score for all courses was 3 (maximum 4, IQR 2.00-3.00). There was some component score variability (Table 3). Component 12: Attention Control had an overall impression score of two, reflecting the low facilitator competence scores for this component. Component 11: Reframing had a similarly low overall impression score of two (IQR 2.00-3.25) although it was delivered with the maximum score for adherence (Median 2, IQR 1.60-2.00) and good levels of competence (Median, 1.63, IQR 1.25-2.00).

Table 3. Overall adherence competence and impression scores

| Component              | Overall adherence |           | Overall competence |           | Overall impression |           |
|------------------------|-------------------|-----------|--------------------|-----------|--------------------|-----------|
|                        | Median scores     | IQR       | Median scores      | IQR       | Median scores      | IQR       |
| 2: Pain information    | <b>1.75</b>       | 1.42-2.00 | <b>1.75</b>        | 1.25-2.00 | <b>3.00</b>        | 3.00-3.00 |
| 3: Acceptance          | <b>2.00</b>       | 1.83-2.00 | <b>1.50</b>        | 1.00-2.00 | <b>3.00</b>        | 2.50-3.00 |
| 5: Pain cycle          | <b>2.00</b>       | 2.00-2.00 | <b>1.88</b>        | 1.50-2.00 | <b>3.00</b>        | 3.00-4.00 |
| 9: Goal setting        | <b>2.00</b>       | 2.00-2.00 | <b>1.50</b>        | 1.00-2.00 | <b>3.00</b>        | 2.00-3.00 |
| 10: Unhelpful thinking | <b>1.67</b>       | 1.67-2.00 | <b>1.50</b>        | 1.00-1.81 | <b>3.00</b>        | 2.00-3.00 |
| 11: Reframing          | <b>2.00</b>       | 1.60-2.00 | <b>1.63</b>        | 1.25-2.00 | <b>2.00</b>        | 2.00-3.25 |
| 12: Attention control  | <b>2.00</b>       | 1.67-2.00 | <b>1.13</b>        | 1.00-1.63 | <b>2.00</b>        | 1.75-3.00 |
| Overall course score   | <b>2.00</b>       | 1.67-2.00 | <b>1.50</b>        | 1.25-2.00 | <b>3.00</b>        | 2.00-3.00 |

### Inter-rater/intra-rater reliability

Percentage agreement scores measured inter-rater reliability. 15 COPERS components were used to measure inter-rater reliability, they comprised 95 adherence item scores, 71 competence item scores and 15 overall impression scores. Inter-rater agreement was 80% for adherence items, 67% for competence items and 53.5% for overall impression scores.

Intra-rater reliability was measured using assessments from 16 COPERS components comprising 94 adherence item scores, 64 competence item scores and 16 overall impression scores intra-rater reliability 91% for adherence items, 75.7% for competence items and 69% for overall impression scores.

## Discussion

The aim of this study was to develop a methodology to assess the level of intervention integrity achieved during the delivery of the COPERS self-management course in a randomized controlled trial setting. To our knowledge this is the most systematic and rigorous published evaluation of the intervention integrity of a complex, theory based behavior change intervention to date. Overall the results suggest that the COPERS course was delivered competently and as intended. We describe the opportunities, challenges, achievements and limitations of this work and discuss these in the context of the emerging science of fidelity assessment with regard to intervention integrity and make recommendations based on our experience which may assist other trialists evaluating complex interventions.

Our work supports the suggestion that effective adherence in complex interventions may involve more than the delivery of prescribed 'surface' content but also adherence to essential but non-content related 'core' theoretical/structural elements.[15] For example, component10: 'Unhelpful Thinking' in the COPERS programme illustrates the challenges in defining adherence in complex interventions. This component was intended to help participants recognise and change patterns of automatic negative and self-limiting thoughts. The course manual outlined the informational content of this component, the structure, sequence, timing and mode of delivery of the various elements to be used by the facilitators. To deliver this component as prescribed a high level of adherence to both content and structure of the session was required. Component 10 had a relatively low adherence score which was primarily caused by the facilitators' difficulty in maintaining the complex structure of the tasks involved in this component rather than a failure to deliver the prescribed content. High levels of adherence to protocols may be associated with a mechanistic, inflexible or unresponsive delivery style and therefore associated with low levels of competence.[7] Conversely, sometimes facilitator 'failure' to deliver the component content as prescribed i.e. low adherence was directly related to low levels of competence. Parts of the course were designed to promote group participation, but if poorly sequenced or timed they often resulted in a didactic/mechanistic delivery style that inhibited rather than encouraged group disclosure and discussion.

1 Seemingly low levels of adherence however may not necessarily be associated with poor intervention delivery.  
2  
3 For example some facilitators deviated from instructions (and were by definition non-adherent) but these  
4  
5 deviations can be re-interpreted positively as the facilitators altered the delivery in response to individual or  
6  
7 group intervention receipt. Some of our facilitators subtly changed delivery from the prescribed content in the  
8  
9 manual but they still achieved the component's overall aims and objectives. This may be a demonstration of  
10  
11 high levels of facilitator competence despite being rated as non-adherent.[15] There is, as yet, little empirical  
12  
13 work that demonstrates the conditions that may influence adaptation or reinvention or whether, and in what  
14  
15 circumstances, these deviations from prescribed protocol may enhance outcomes or decrease  
16  
17 effectiveness.[17]  
18  
19  
20  
21  
22  
23

24 The monitoring and assessment of competence within the COPERS study illustrated the difficulties associated  
25  
26 with its measurement. Recent work has identified competence as a complex construct that includes: the ability  
27  
28 to establish collaborative relationships and form alliances with participants,[40] through the use of responsive  
29  
30 tailoring of programme content,[40] the pacing of delivery,[41] and the use of positive verbal and non-verbal  
31  
32 behaviours.[43]  
33  
34  
35  
36

37 The findings from the COPERS study support those who consider that levels of competence are more  
38  
39 sensitive to contextual factors than adherence.[7] The greater variability in our competence scores, compared  
40  
41 to those for adherence reflect, in part, the diversity of facilitator skills required to deliver the COPERS  
42  
43 programme and the recognised practical and methodological difficulties in measuring what may seem to be a  
44  
45 subjective concept.[7,20,24]  
46  
47  
48  
49  
50  
51

52 Our work supports the hypothesis that competence as a multidimensional construct. Effective intervention  
53  
54 delivery may be influenced and moderated by many factors such as: positive or negative individuals and or  
55  
56 groups, individual intervention receipt, component content, facilitator and co-facilitator coherence or  
57  
58 incoherence, issues related to the use of computer hardware and software, the venue, the distribution of hand-  
59  
60

1 outs, use of flip charts, the co-ordination and organisation of group activities, feedback and time management.  
2  
3 Experience also influences competence and we noted that our facilitators appeared to improve with each  
4  
5 course they conducted. Our ratings might also reflect the inexperience of the facilitators who were delivering a  
6  
7 new initiative.  
8  
9

10  
11  
12 The overall impression measure was in part designed to reflect some of the 'non-facilitator determined' factors  
13  
14 not evaluated by the adherence and competence measures. This subjective measure assessed the extent to  
15  
16 which the component achieved its specific aims and was consistent with the goals of the wider programme.  
17  
18 The overall impression measure proved to be challenging to use and the data difficult to interpret. Evaluators  
19  
20 found it relatively straightforward to assess a component as either 'Excellent' or 'Did not go well', but the  
21  
22 intermediate scores were less reliable.  
23  
24  
25  
26  
27  
28  
29

### 30 **Limitations**

31  
32  
33 *Within the emerging science of fidelity assessment there is a recognition of the need for reliable measurement*  
34  
35 *instruments. [17,22] The varying levels of inter and intra rater reliability found in our work reflect the conceptual*  
36  
37 *and methodological difficulties of measuring interventionist behaviours at the point of program delivery. We*  
38  
39 *consider that our adherence, competence and overall impression measures are developmental and that in the*  
40  
41 *future the use of triangulated data from multiple sources and more differentiated, contextually sensitive*  
42  
43 *measures specifically designed for complex interventions may prove to be of great value.* We used audio  
44  
45 recordings to evaluate the components but it is doubtful if sound recordings alone can capture the subtleties of  
46  
47 facilitator competence involving non-verbal behaviours, the dynamics of both facilitators and individual and  
48  
49 group interactions. *Although the assessment of adherence and competence was carried out by evaluators not*  
50  
51 *directly involved in the delivery of each assessed component the overall evaluation of the COPERS*  
52  
53 *intervention was conducted by members of the study team and this may have led to bias.* The adherence  
54  
55 measures were designed to assess the fundamental requirements of course delivery, however the use of a  
56  
57 generic competence measure may not have reflected the range of skills required to deliver the various course  
58  
59  
60

1 components. The absence of standardised definitions and the lack of valid and reliable measures of adherence  
2  
3 and competence made assessments of the impact on outcomes difficult.[20]  
4  
5  
6  
7

## 8 **Lessons learned**

9

10  
11 Our experience of assessing fidelity enabled us to gain valuable insights which may be of use to others  
12  
13 evaluating the fidelity of complex interventions, these are summarised in Table 4.  
14  
15  
16  
17  
18  
19

### 20 **Table 4. Insights / key messages on the application of a standardised approach to evaluate** 21 **intervention integrity.**

22  
23  
24  
25  
26

- |                                                                                                                                                                                                                                                                                                                                                                                                                                                                                                                                                                                                                                                                                                                                                                                                                                                                                                                                                                                                                                                                                                                                                                                                                                                                                                                                                                                                                                                                                         |
|-----------------------------------------------------------------------------------------------------------------------------------------------------------------------------------------------------------------------------------------------------------------------------------------------------------------------------------------------------------------------------------------------------------------------------------------------------------------------------------------------------------------------------------------------------------------------------------------------------------------------------------------------------------------------------------------------------------------------------------------------------------------------------------------------------------------------------------------------------------------------------------------------------------------------------------------------------------------------------------------------------------------------------------------------------------------------------------------------------------------------------------------------------------------------------------------------------------------------------------------------------------------------------------------------------------------------------------------------------------------------------------------------------------------------------------------------------------------------------------------|
| <p>27 i) Evaluation of interventions is dependent on the <i>a priori</i> formulation of adherence and<br/>28 competence criteria based on the theoretical underpinnings, aims and content of the intervention.<br/>29<br/>30 ii) Adherence and competence criteria should be considered during the intervention design, inform<br/>31 the training for those delivering the intervention and should be incorporated into program manuals<br/>32 and supporting materials.<br/>33<br/>34 iii) Evaluation of intervention integrity requires a sophisticated understanding of the intervention.<br/>35 <b>Comprehensive and cost-effective fidelity assessor/evaluator training can be provided alongside</b><br/>36 <b>trainee interventionists within course delivery training programs.</b><br/>37<br/>38 iv) Evaluation of competence optimally requires data from multiple sources such as audio and<br/>39 video recordings, self-report and independent observation.<br/>40<br/>41 v) The comprehensive evaluation of competence requires the creation of measures that are<br/>42 sensitive to the complexity of the construct and take into account the intervention specific<br/>43 contextual variables that influence it.<br/>44<br/>45 vi) Levels of intervention integrity may vary over time. To ensure a valid assessment of<br/>46 intervention integrity it should be assessed systematically throughout the delivery phase of a trial.<br/>47<br/>48<br/>49<br/>50</p> |
|-----------------------------------------------------------------------------------------------------------------------------------------------------------------------------------------------------------------------------------------------------------------------------------------------------------------------------------------------------------------------------------------------------------------------------------------------------------------------------------------------------------------------------------------------------------------------------------------------------------------------------------------------------------------------------------------------------------------------------------------------------------------------------------------------------------------------------------------------------------------------------------------------------------------------------------------------------------------------------------------------------------------------------------------------------------------------------------------------------------------------------------------------------------------------------------------------------------------------------------------------------------------------------------------------------------------------------------------------------------------------------------------------------------------------------------------------------------------------------------------|
- 51  
52  
53

## 54 **Conclusions**

55

56 We are confident that the COPERS intervention was delivered with high levels of adherence good levels of  
57  
58 competence and that the programme aims were largely achieved and therefore we anticipate that our outcome  
59  
60

1 data will not be influenced by poor intervention delivery. In this paper we presented a method for assessing  
2 adherence and competence and demonstrated its use in a large pragmatic RCT but we agree with the MRC  
3 that more work is necessary to ensure that the growth of complex interventions is accompanied by more robust  
4 systems of evaluation.  
5  
6  
7  
8

### 9 **Author affiliations**

10  
11  
12  
13  
14 <sup>1,3,4,6</sup> Centre for Primary Care and Public Health, Blizard Institute, Barts and The London School of Medicine  
15 and Dentistry, Yvonne Carter Building, 58 Turner Street, London. E1 2AB.

16  
17  
18 <sup>2</sup> Clinical Trials Unit, Warwick Medical School, University of Warwick, Coventry. CV4 7AL.

19  
20  
21 <sup>6</sup> Division of Health Sciences, Warwick Medical School, University of Warwick, Coventry. CV4 7AL.  
22  
23  
24

25 **Contributors** MU, DC and ST conceived the original idea for the COPERS study. DE wrote the fidelity protocol  
26 with input from DC, KH, MU, TM and ST. DC, DE, KH and TM evaluated intervention integrity. TM wrote the  
27 first draft of this paper, DC, DE, KH, MU, ST contributed to each successive draft of the manuscript.  
28  
29  
30  
31  
32  
33

34 **Funding** This paper presents independent research commissioned by the National Institute for Health  
35 Research (NIHR) under its Programme Grants for Applied Research scheme (RP-PG-0707-10189). The views  
36 expressed in this publication are those of the authors and not necessarily those of the NHS, the NIHR or the  
37 Department of Health. This project benefitted from facilities funded through the Birmingham Science City  
38 Translational Medicine Clinical Research and Infrastructure Trials platform, with support from Advantage West  
39 Midlands.  
40  
41  
42  
43  
44  
45  
46  
47  
48

49 **Competing interests** None  
50  
51  
52

53  
54 **Ethics approval** Ethics approval was given by Cambridge Ethics Committee 11/EE/046.

55  
56 Trial registration: ISRCTN24426731  
57  
58  
59  
60

1 **Provenance and peer review** Not commissioned; internally peer reviewed.  
2  
3  
4

5 **References**  
6  
7

- 8 1. Michie S, Fixsen D, Grimshaw JM, et al. Specifying and reporting complex behaviour change  
9 interventions: the need for a scientific method. *Implementation Science* 2009,4:40.  
10  
11  
12
- 13 2. Medical Research Council: Developing and Evaluating Complex Interventions: New Guidance. London.  
14  
15 2008.  
16  
17  
18  
19
- 20 3. Bellg AJ, Borrelli B, Resnick B, et al. Enhancing treatment fidelity in health behavior change studies:  
21 best practices and recommendations from the NIH Behavior Change Consortium. *Health Psychology*  
22 2004,23(5):443-451.  
23  
24  
25  
26  
27  
28  
29
- 30 4. Yeaton WH, Sechrest L. Critical dimensions in the choice and maintenance of successful treatments:  
31 strength, integrity, and effectiveness. *Journal of consulting and clinical psychology* 1981,49(2):156-167.  
32  
33  
34  
35  
36
- 37 5. Moncher FJ, Prinz R. Treatment Fidelity in Outcome Studies. *Clinical Psychology Review* 1991,  
38 11:247-266.  
39  
40  
41  
42
- 43 6. Basch CE, Sliepecevic EM, Gold RS, Duncan DF, Kolbe LJ. Avoiding Type Three Errors in Health  
44 Education Program Calculations: A Case Study. *Health Education Quarterly* 1985,12:315-31.  
45  
46  
47  
48
- 49 7. Waltz J, Addis ME, Koerner K, Jacobson NS. Testing the integrity of a psychotherapy protocol:  
50 assessment of adherence and competence. *Journal of consulting and clinical psychology*  
51 1993,61(4):620-630.  
52  
53  
54  
55  
56  
57
- 58 8. Mihalic SF. The Importance of Implementation Fidelity. Violence Prevention Initiative. Boulder,  
59  
60



- 1 Colorado; 2002.
- 2
- 3
- 4
- 5 9. Elliot D, Mihalic S. Issues in disseminating and replicating effective prevention programs. *Prevention*
- 6
- 7 *Science* 2004,5:47-53.
- 8
- 9
- 10
- 11
- 12 10. Noel P. The impact of therapeutic case management on participation in adolescent substance abuse
- 13
- 14 treatment. *American Journal of Alcohol Abuse* 2006,13:311-327.
- 15
- 16
- 17
- 18 11. Thomas RE, Baker P, Lorenzetti D. Family-based programmes for preventing smoking by children and
- 19
- 20 adolescents. *Cochrane Systematic Review* CD004493. 2007.
- 21
- 22
- 23
- 24
- 25 12. Perepletchikova F, Kazdin A. Treatment Integrity and Therapeutic Change:
- 26
- 27 Issues and Research Recommendations. *Clinical Psychological Practice* 2005,12:365-383.
- 28
- 29
- 30
- 31 13. Steckler A, Linnan L, eds. *Process Evaluation for Public Health interventions and Research*. San
- 32
- 33 Francisco: Wiley (Jossey-Bass); 2002.
- 34
- 35
- 36
- 37
- 38 14. Borrelli B, Sepinwall D, Ernst D, et al. A new tool to assess treatment fidelity and evaluation of
- 39
- 40 treatment fidelity across 10 years of health behavior research. *Journal of consulting and clinical*
- 41
- 42 *psychology* 2005,73(5):852-860.
- 43
- 44
- 45
- 46 15. Durlak JA, Du Pre EP. Implementation matters: a review of research on the influence of implementation
- 47
- 48 on program outcomes and the factors affecting implementation. *Am J Community Psychology*
- 49
- 50 2008,41(3-4):327-350.
- 51
- 52
- 53
- 54
- 55 16. Hulscher ME, Laurant MG, Grol RP. Process evaluation on quality improvement interventions. *Quality*
- 56
- 57 *Safety and Health Care* 2003,12(1):40-46.
- 58
- 59
- 60

- 1  
2  
3 17. Dusenbury L, Brannigan R, Falco M, et al. A review of research on fidelity of implementation:  
4 implications for drug abuse prevention in school settings. *Health Education Res* 2003,18(2):237-256.  
5  
6  
7  
8  
9  
10 18. Carroll C, Patterson M, Wood S, et al. A conceptual framework for implementation fidelity. *Implement*  
11 *Science* 2007,2:40.  
12  
13  
14  
15  
16 19. Gearing RE, El-Bassel N, Ghesquiere A, et al. Major ingredients of fidelity: a review and scientific guide  
17 to improving quality of intervention research implementation. *Clinical Psychology Rev* 2011,31(1):79-88.  
18  
19  
20  
21  
22 20. Cross WF, West JC. Examining implementer fidelity: Conceptualizing and measuring adherence and  
23 competence. *J Child Serv* 2011,6(1):18-33.  
24  
25  
26  
27  
28  
29 21. Mihalic SF, Argamaso S. Implementing the Life Skills training drug prevention program: factors related  
30 to implementation fidelity. *Implementation Science* 2008,3(5).  
31  
32  
33  
34  
35  
36 22. Parham LD, Cohn ES, E, Spitzer S, et al. Development of a fidelity measure for research on the  
37 effectiveness of the Ayres Sensory Integration intervention. *Am J Occup Ther* 2011, 65(2):133-142.  
38  
39  
40  
41  
42 23. Borrelli B. The Assessment, Monitoring, and Enhancement of Treatment Fidelity In Public Health  
43 Clinical Trials. *J Public Health Dent* 2011,71(s1):S52-S63.  
44  
45  
46  
47  
48  
49 24. Stiles WB, Honos-Webb L, Surko M. Responsiveness in psychotherapy. *Clinical Psychology: Science*  
50 *and Practice* 1998, 5(4):438-458.  
51  
52  
53  
54  
55 25. Barber JP, Mercer D, Krakauer I, et al. Development of an adherence/competence rating scale for  
56 individual drug counselling. *Drug Alcohol Depend* 1996,43(3):125-132.  
57  
58  
59  
60

- 1 26. Castonguay LG, Goldfried M, Wiser SRP, et al. Predicting the effect of cognitive therapy for depression:  
2 a study of unique and common factors. *Journal of consulting and clinical psychology* 1996,64(3):497-  
3 504.  
4  
5  
6  
7  
8  
9  
10 27. Huey SJ Jr, Henggeler SW, Melton GB, et al. Mechanisms of change in multisystemic therapy: reducing  
11 delinquent behavior through therapist adherence and improved family and peer functioning. *Journal of*  
12 *consulting and clinical psychology* 2000,68(3):451-467.  
13  
14  
15  
16  
17  
18 28. Barber JP, Crits-Christoph P, Luborsky L. Effects of therapist adherence and competence on patient  
19 outcome in brief dynamic therapy. *Journal of consulting and clinical psychology* 1996, 64(3):619-622.  
20  
21  
22  
23  
24  
25 29. Henggeler SW, Rowland MD, Pickrel SG, et al. Investigating family-based alternatives to institution-  
26 based mental health services for youth: lessons learned from the pilot study of a randomized field trial.  
27 *J Clin Child Psychol* 1997,26(3):226-233.  
28  
29  
30  
31  
32  
33  
34 30. Hayes SC, Strosahl KD, Wilson KG. Acceptance and Commitment Therapy: An Experiential Approach  
35 to Behaviour Change: Guilford Press; 2004.  
36  
37  
38  
39  
40 31. Hayes SC, Smith SX. Get Out of Your Mind and into Your Life: The New Acceptance and Commitment  
41 Therapy. New Harbinger Publications; 2005.  
42  
43  
44  
45  
46 32. McCracken LM, Vowles KE, Eccleston C: Acceptance of chronic pain: component analysis and a  
47 revised assessment method. *Pain* 2004,107(1-2):159-166.  
48  
49  
50  
51  
52  
53 33. Vlaeyen JW, Linton SJ. Fear-avoidance and its consequences in chronic musculoskeletal pain: a state  
54 of the art. *Pain* 2000,85(3):317-332.  
55  
56  
57  
58  
59 34. Beck JS. Cognitive Therapy. New York: The Guildford Press; 1995.  
60

- 1  
2  
3 35. Bandura A. Social Foundations of Thought and Action: A Social Cognitive Theory. Pearson  
4 Education;1986.  
5  
6  
7  
8  
9  
10 36. Ellis A, Dryden W. The Practice of Rational Emotive Behavior therapy. 2nd ed: Springer Publishing;  
11 2007.  
12  
13  
14  
15  
16 37. Morley S, Shapiro DA, Biggs J. Developing a treatment manual for attention management in chronic  
17 pain. *Cognitive Behaviour Therapy* 2004,33(1):1-11.  
18  
19  
20  
21  
22  
23 38. Carroll KM, Nich C, Rounasville BJ. Use of observer and therapist ratings to monitor delivery of coping  
24 skills treatment for cocaine abusers: utility of therapist session checklists. *Psychotherapy Research*  
25 1998,8:307-320.  
26  
27  
28  
29  
30  
31 39. Carroll KM, Nich C, Sifry RL, et al. A general system for evaluating therapist adherence and  
32 competence in psychotherapy research in the addictions. *Drug and Alcohol Dependence*  
33 2000,57(3):225-238.  
34  
35  
36  
37  
38  
39  
40 40. Creed TA, Kendall PC. Therapist alliance-building behavior within a cognitive-behavioral treatment for  
41 anxiety in youth. *Journal of consulting and clinical psychology* 2005,73(3):498-505.  
42  
43  
44  
45  
46 41. Davidson K, Scott J, Schmidt U, et al. Therapist competence and clinical outcome in the Prevention of  
47 Parasuicide by Manual Assisted Cognitive Behaviour Therapy trial: the POPMACT study. *Psychol Med*  
48 2004,34(5):855-863.  
49  
50  
51  
52  
53  
54  
55  
56  
57 42. Lochman JE, Boxmeyer C, Powell N, et al. Dissemination of the Coping Power program: importance of  
58 intensity of counselor training. *Journal of consulting and clinical psychology* 2009,77(3):397-409.  
59  
60

- 1  
2  
3 43. Crowe TP, Grenyer BFS. Is therapist alliance or whole group cohesion more influential in group  
4  
5 psychology outcomes? *Clinical Psychology and Psychotherapeutics* 2008,15:239-246.  
6  
7  
8  
9  
10  
11  
12  
13  
14  
15  
16  
17  
18  
19  
20  
21  
22  
23  
24  
25  
26  
27  
28  
29  
30  
31  
32  
33  
34  
35  
36  
37  
38  
39  
40  
41  
42  
43  
44  
45  
46  
47  
48  
49  
50  
51  
52  
53  
54  
55  
56  
57  
58  
59  
60
